# 1 Foundation Species Across a Latitudinal Gradient in 2 China

3 Xiujuan Qiao<sup>1,2</sup>, Jiabin Zhang<sup>1,2,3</sup>, Yaozhan Xu<sup>1,2</sup>, Xiangcheng Mi<sup>4</sup>, Min  
4 Cao<sup>5</sup>, Wanhui Ye<sup>6</sup>, Guangze Jin<sup>7</sup>, Zhanqing Hao<sup>8</sup>, Xugao Wang<sup>8</sup>, Xihua  
5 Wang<sup>9</sup>, Songyan Tian<sup>10</sup>, Xiankun Li<sup>11</sup>, Wusheng Xiang<sup>11</sup>, Yankun Liu<sup>12</sup>,  
6 Yingnan Shao<sup>10</sup>, Kun Xu<sup>13</sup>, Weiguo Sang<sup>14,15</sup>, Fuping Zeng<sup>16</sup>, Mingxi  
7 Jiang<sup>1,2</sup>, Haibao Ren<sup>4</sup>, and Aaron M. Ellison<sup>17,\*</sup>

8 <sup>1</sup>Key Laboratory of Aquatic Botany and Watershed Ecology, Wuhan  
9 Botanical Garden, Chinese Academy of Sciences [CAS], Wuhan, 430074,  
10 China

11 <sup>2</sup>Center of Conservation Biology, Core Botanical Gardens, CAS, Wuhan  
12 430074, China

13 <sup>3</sup>University of CAS, Beijing, 100049, China

14 <sup>4</sup>State Key Laboratory of Vegetation and Environmental Change, Institute  
15 of Botany (CAS), Beijing, 100093, China

16 <sup>5</sup>Xishuangbanna Tropical Botanical Garden (CAS), Kunming, 650023,  
17 China

18 <sup>6</sup>South China Botanical Garden (CAS), Guangzhou, 510650, China

19 <sup>7</sup>Center for Ecological Research, Northeast Forestry University, Harbin,  
20 150040, China

21 <sup>8</sup>Institute of Applied Ecology (CAS), Shenyang, 110016, China

22 <sup>9</sup>Department of Environmental Science, East China Normal University,  
23 Shanghai, 200062, China

24 <sup>10</sup>Key laboratory of Forest Ecology and Forestry Ecological Engineering of  
25 Heilongjiang Province, Harbin, 150040, China

26 <sup>11</sup>Guangxi Institute of Botany (CAS), Guilin, 541006, China

27 <sup>12</sup>National Positioning Observation Station of Mudanjiang Forest  
28 Ecosystem in Heilongjiang Province, Mudanjiang, 157500, China

29 <sup>13</sup>Lijiang Forest Ecosystem Research Station, Kunming Institute of Botany  
30 (CAS), Kunming, 650201, China

31 <sup>14</sup>Minzu University of China, Beijing, 100081, China

32 <sup>15</sup>State Key Laboratory of Vegetation and Environmental Change, Institute  
33 of Botany (CAS), Beijing, 100093, China

34 <sup>16</sup>Key Laboratory of Agro-ecological Processes in Subtropical Region,  
35 Institute of Subtropical Agriculture (CAS), Changsha, 410125, China

36 <sup>17</sup>Harvard Forest, Harvard University, Petersham, Massachusetts 01366,  
37 USA

38 \*For all correspondence: [aellison@fas.harvard.edu](mailto:aellison@fas.harvard.edu)

39 March 10, 2020

## Abstract

Foundation species play important roles in structuring forest communities and ecosystems. Foundation species are difficult to identify without long-term observations or experiments and their foundational roles rarely are identified before they are declining or threatened. We used new statistical criteria based on size-frequency distributions, species diversity, and spatial codispersion among woody plants to identify potential (“candidate”) foundation species in 12 large forest dynamics plots spanning 26 degrees of latitude in China. We used these data to identify a suite of candidate foundation species in Chinese forests; test the hypothesis that foundation woody plant species are more frequent in the temperate zone than in the tropics; and compare these results with comparable data from the Americas to suggest candidate foundation genera in Northern Hemisphere forests. We identified more candidate foundation species in temperate plots than in subtropical or tropical plots, and this relationship was independent of the latitudinal gradient in overall species richness. Two species of *Acer*, the canopy tree *Acer ukurunduense* and the shrubby treelet *Acer barbinerve* were the only two species that met both criteria in full to be considered as candidate foundation species. When we relaxed the diversity criteria, *Acer*, *Tilia*, and *Juglans* spp., and *Corlyus mandshurica* were frequently identified as candidate foundation species. In tropical plots, the tree *Mezzettiopsis creaghii* and the shrubs or treelets *Aporusa yunnanensis* and *Ficus hispida* had some characteristics associated with foundation species. Species diversity of co-occurring woody species was negatively associated with basal area of candidate foundation species more frequently at 5- and 10-m spatial grains (scale) than at a 20-m grain. Conversely, Bray-Curtis dissimilarity was positively associated with basal area of candidate foundation species more frequently at 5-m than at 10- or 20-m grains. Our data support the hypothesis that foundation species should be more common in temperate than in tropical or boreal forests, and suggest that in the Northern Hemisphere that *Acer* be investigated further as a foundation tree genus.

**Keywords:** Beta diversity, biodiversity, China, CForBio, codispersion analysis, forest dynamic plots, ForestGEO, latitudinal gradient.

## 69 Introduction

70 A foundation species is a single species (or a group of functionally similar taxa) that dom-  
71 inates an assemblage numerically and in overall size (e.g., mass or area occupied), determines  
72 the diversity of associated taxa through non-trophic interactions, and modulates fluxes of  
73 nutrients and energy at multiple control points in the ecosystem it defines (Ellison, 2019).  
74 Because foundation species are common and abundant, they generally receive less attention  
75 from conservation biologists, conservation professionals, and natural-resource managers who  
76 emphasize the study, management or protection of rare, threatened, or endangered species  
77 (Gaston and Fuller, 2007, 2008). However, protecting foundation species before they decline  
78 to non-functional levels can maintain habitat integrity, thereby protecting associated rare  
79 species at lower cost and less effort (Ellison and Degrassi, 2017; Degrassi et al., 2019).

80 Identifying foundation species is difficult because it can take many years—often decades—  
81 to collect enough data to distinguish foundation species from other species that also are  
82 common, abundant, or dominant (*sensu* Grime, 1987) but lack “foundational” characteristics  
83 (Baiser et al., 2013; Ellison, 2014, 2019). Rather than investigating one common or dominant  
84 species at a time in myriad ecosystems, Ellison and his colleagues have worked with data  
85 from individual and multiple large forest dynamics plots within the ForestGEO network<sup>1</sup> to  
86 develop statistical criteria that can suggest which tree species might merit further attention  
87 as candidate foundation species in forests (Buckley et al., 2016*a,b*; Case et al., 2016; Ellison  
88 et al., 2019). Specifically, Ellison et al. (2019) proposed two statistical criteria for candidate  
89 foundation tree species based on their size-frequency and abundance-diameter distributions,  
90 and on their spatial effects of on the alpha diversity (as Hill numbers: Chao et al., 2014) and  
91 beta diversity (e.g., Bray-Curtis dissimilarity) of co-occurring species.

92 The first criterion is that candidate foundation tree species are outliers from the expected  
93 “reverse-J” size-frequency distribution observed in virtually all assemblages of co-occurring  
94 species (Loehle, 2006). The departure from expected size-frequency relationships reflects the

---

<sup>1</sup><https://www.forestgeo.si.edu/>



95 abundance of foundation species and their relatively large sizes that lead to their dispropor-  
96 tionate influence on overall community structure. We refer to this criterion as the “outlier  
97 criterion”.

98 The second criterion (the “diversity criterion”) is that the size or abundance of candi-  
99 date foundation tree species should be negatively associated with species diversity (alpha  
100 diversity) of other woody plants at local (small) spatial scales but positively associated with  
101 species turnover (beta diversity) across large forest plots or stands (Ellison et al., 2019). The  
102 negative spatial association between the size or abundance of foundation tree species with  
103 local diversity of co-occurring woody species results simply from the foundation species occu-  
104 pying most of the available space in a standard 20×20-m forest plot (or, in fact, any relatively  
105 small plot). In contrast, the positive spatial association between the size or abundance of  
106 a foundation tree species with beta diversity results from it creating patchy assemblages at  
107 landscape scales. For example, forest stands dominated by foundation species such as *Tsuga*  
108 *canadensis* in eastern North America or *Pseudotsuga menziesii* in western North America  
109 manifest themselves as distinctive patches on the landscape. When these foundation species  
110 decline or are selectively harvested, the landscape is homogenized and beta diversity declines.  
111 Indeed, Ellison et al. (2019) suggested that the preservation of landscape diversity may be  
112 the most important reason to protect and manage foundation tree species before they decline  
113 or disappear.

114 We emphasize that the application of these criteria to identify candidate foundation  
115 species leads to the hypothesis that a particular taxon may be a foundation species, not that  
116 it is one. Asserting that a species is a foundation species requires additional observational  
117 and, ideally, experimental evidence (Ellison, 2014, 2019). Indeed, we derived these two  
118 statistical criteria after more than a decade of observational and experimental studies of  
119 *Tsuga canadensis*-dominated forests in New England, USA that lend strong support for the  
120 hypothesis that *T. canadensis* is a foundation species (Orwig et al., 2013; Ellison, 2014).  
121 These criteria subsequently were applied to five additional forest dynamics plots in the

122 western hemisphere (Buckley et al., 2016b; Ellison et al., 2019) with encouraging results.  
123 Here, we apply these criteria to 12 large forest dynamics plots in China that range from  
124 cold-temperate boreal forests to tropical rain forests. These plots are all part of the Chinese  
125 Forest Biodiversity Monitoring Network (CForBio)<sup>2</sup>, itself a part of the ForestGEO network.

126 There are two, fundamentally new contributions of this work. First, we test the hypoth-  
127 esis that foundation tree species should be uncommon or absent in subtropical and tropical  
128 forests. Empirical support for particular trees having foundational roles in forests is strongest  
129 for temperate forests (Schweitzer et al., 2004; Whitham et al., 2006; Ellison, 2014; Tomback  
130 et al., 2016) and low-diversity tropical forests (Ellison et al., 2005), and Ellison et al. (2005)  
131 hypothesized that foundation tree species would be less likely in species-rich tropical forests  
132 (Ellison et al., 2019). Second, the application of our statistical criteria yield new insights  
133 into ecological patterns and processes not only for China, but also concerning similarities  
134 between the floras of East Asia and Eastern North America (Tiffney, 1985; Pennington et al.,  
135 2004).

## 136 **Methods**

### 137 **Forest dynamics plots in China**

138 We used data from 12 of the 17 CForBio plots in our exploration of candidate foundation  
139 species in Chinese forests (Table 1). These plots span 26 degrees of latitude and include:  
140 the 9-ha broad-leaved Korean pine mixed forest plot at Liangshui in the Xiaoxing’an Moun-  
141 tains of Heilongjiang Province; the 25-ha *Taxus cuspidata*-dominated forest in the Muling  
142 Nature Reserve, also in Heilongjiang Province; the 25-ha deciduous broad-leaved Korean  
143 pine mixed forest plot on Changbai Mountain in Jinlin Province; the 20-ha warm-temperate  
144 deciduous broad-leaved forest plot on Dongling Mountain in Beijing; the 25-ha subtropical ev-  
145 ergreen broad-leaved forest plot on Tiantong Mountain in Zhejiang Province; the 25-ha mid-

---

<sup>2</sup><http://www.cfbiobdiv.org>

146 subtropical mountain evergreen and deciduous broad-leaved mixed forest plot on Badagong  
147 Mountain in Hunan province; the 24-ha subtropical evergreen broad-leaved forest plot on  
148 Gutian Mountain in Zhejiang Province; 20-ha lower subtropical evergreen broad-leaved forest  
149 plot on Dinghu Mountain in Guangdong Province; the 25-ha cold-temperate spruce-fir forest  
150 plot on Yulong Snow Mountain in Yunnan Province; the 25-ha karst evergreen and deciduous  
151 broad-leaved mixed forest plot at Mulun in the Guangxi Zhuang Autonomous Region; the  
152 15-ha karst seasonal rain-forest plot at Nonggang, also in the Guangxi Zhuang Autonomous  
153 Region; and the 20-ha tropical forest plot at Xishuangbanna in Yunnan Province.

154 [Table 1 about here.]

155 The 9-ha Liangshui plot (“LS”; 47.18 °N, 128.88 °E) was established in 2005. This plot  
156 is located in the Liangshui National Reserve, which has been spared from logging and other  
157 major disturbance since 1952 (Liu et al., 2014), and represents the climax vegetation type  
158 of Northeast China (Xu and Jin, 2013). It is considered to be one of the most typical and  
159 intact mixed broad-leaved-Korean pine forests in China. The plot has an elevational range  
160 from 425 to 508 m a.s.l, a mean annual temperature of  $-0.3^{\circ}\text{C}$ , and receives on average 676  
161 mm of precipitation annually. In the first census in 2010, 21,355 individuals stems in 48  
162 species, 34 genera, and 20 families were recorded. The average age of the overstory trees  
163 was approximately 200 years (Liu et al., 2014). The “reverse-J” diameter distribution of  
164 all individuals in LS suggested that the forest was regenerating well. The dominant tree  
165 species at LS is *Pinus koraiensis*. Major associated tree species include *Tilia amurensis*, *T.*  
166 *mandshurica*, *Betula costata*, and *Fraxinus mandshurica* (Xu and Jin, 2013).

167 The 25-ha Muling plot (“MLG”; 43.95 °N, 130.07 °E) was established in 2014 within the  
168 Muling Nature Reserve. The elevation within the plot varies from 658–781 m, the average  
169 annual temperature is  $-2^{\circ}\text{C}$ , and the average annual precipitation is 530 mm. Muling is  
170 a typical middle-aged, multi-storied, uneven aged forest. Dominant tree species are *Tilia*  
171 *amurensis*, *Pinus koraiensis*, *Acer mono*, *Abies nephrolepis* and *Betula costata*. 63,877 in-  
172 dividuals belonging to 22 families, 38 genera, and 57 woody species were recorded at the

173 first census, including the nationally endangered *Taxus cuspidata* (Diao et al., 2016). The  
174 average DBH of all woody stems in MLG at the first census was 7.8 cm.

175 The 25-ha Changbai Mountain plot (“CB”; 42.28 °N, 128.08 °E), established in 2004,  
176 was the first temperate forest dynamics plot in the ForestGEO network. It is considered  
177 to be a typical old-growth, multi-storied, uneven-aged forest, and has neither been logged  
178 nor suffered other severe human disturbances since 1960 (Wang et al., 2010). The average  
179 annual temperature at CB is 3.6 °C and average annual precipitation is 700 mm. The terrain  
180 of CB is relatively even, with elevations ranging from 791 to 809 m a.s.l. The height of the  
181 main canopy species is  $\approx 30$  m, and the oldest trees are  $\approx 300$  years old. In the first census,  
182 38,902 individuals in 52 species representing 32 genera and 18 families were recorded. The  
183 most common species at CB are *Pinus koraiensis*, *Tilia amurensis*, *Quercus mongolica*, and  
184 *Fraxinus mandshurica* (Hao et al., 2008). The most abundant eight species accounted for  
185 83.4% of the total individuals in the plot (Wang et al., 2010).

186 The 20-ha Dongling Mountain plot (“DL”; 39.96 °N, 115.43 °E), established in 2010, is  
187 in a warm temperate deciduous broad-leaved forest. The average annual temperature at DL  
188 is 4.8 °C and it receives 500–650 mm of precipitation each year. The mean elevation of the  
189 plot is 1395 m, but the terrain is relatively steep with an elevation change of 219 m and  
190 slopes ranging from 20–60° (Liu et al., 2011). In the first census, 52,316 individuals in 58  
191 species, 33 genera, and 18 families were recorded. The dominant species are all deciduous  
192 trees, and include *Quercus wutaishanica*, *Acer mono*, and *Betula dahurica* (Liu et al., 2011).  
193 The most common five species in the plot comprised 61% of all individuals, whilst the most  
194 common 20 species comprised 92% of all individuals (Liu et al., 2011).

195 The 20-ha Tiantong plot (“TT”; 29.80 °N, 121.80 °E) represents a typical lower subtropi-  
196 cal evergreen broad-leaf forest. It was established in 2009 within the core area of the Ningbo  
197 Tiantong National Forest Park. Mean annual temperature at TT is 16.2 °C and mean annual  
198 rainfall is 1375 mm. There have been some typhoon-caused landslides in some parts of the  
199 plot (Yang et al., 2011), but it is otherwise considered to be free from human disturbance

200 (Yan et al., 2018). Like Dongling Mountain, TT has a large elevational change across the  
201 plot, ranging from 304 to 603 m a.s.l. In the first census, 94,603 individuals in 152 species,  
202 94 genera, and 51 families were recorded. The dominant species are *Eurya loquaiana*, *Litsea*  
203 *elongata*, and *Choerospondias axiliaris* (Yang et al., 2011).

204 The 25-ha Badagong Mountain plot (“BDG”; 29.77 °N, 110.09 °E), established in 2011, is  
205 located near the center of distribution of the oak genus *Fagus*. This plot is within the north  
206 subtropical mountain humid monsoon climate; the average annual temperature is 11 °C and  
207 average annual rainfall is 2105 mm (Lu et al., 2013). The dominant trees are a mixture  
208 of evergreen (*Cyclobalanopsis multinervis*, *C. gracilis*, and *Schima parviflora*) and deciduous  
209 species (*Fagus lucida*, *Carpinus fargesii*, and *Sassafras tzumu*). During the first census,  
210 186,556 individuals, belonging to 53 families, 114 genera, and 232 species were recorded  
211 (Qin et al., 2018). There were 38 species with  $\geq 1000$  individuals, most in the shrub layer (Lu  
212 et al., 2013).

213 The 24-ha Gutian Mountain plot (“GT”; 29.25 °N, 118.12 °E) was established in 2005  
214 as representing a typical mid-subtropical evergreen broad-leaved forest (Legendre et al.,  
215 2009). Like the other montane plots, GT has a broad elevational range (446–715 m a.s.l.)  
216 with steep topography (slopes 12–62°). Average annual temperature at GT is 15.3 °C and  
217 average annual rainfall is 1964 mm. In the first census, 140,700 individuals in 159 species,  
218 104 genera, and 49 families were recorded. Dominant species at GT include *Castanopsis*  
219 *eyrei* and *Schima superba* (Legendre et al., 2009).

220 The 25-ha Yulong Snow Mountain plot (“YLXS”; 27.14 °N, 100.22 °E), established in  
221 2014, is at the highest elevation (3282 m a.s.l.) of the 12 plots we studied. Although the  
222 latitude of this plot is very low, the climate of this coniferous forest plot is cold-temperate  
223 because of its high elevation. The average annual temperature at YL is 5.5 °C and annual  
224 precipitation is 1588 mm (Huang et al., 2017). In the first census, 47,751 individuals in 62  
225 species, 41 genera, and 26 families were recorded, dominated by *Berberis fallax* and *Abies*  
226 *forrestii* (Huang et al., 2017).

227 The 25-ha Mulun plot (“ML”; 25.80 °N, 108.00 °E), also established in 2014, is within  
228 the Mulun National Natural Reserve. The mean annual temperature at ML is 19.3 °C, and  
229 the average annual rainfall is 1529 mm. The terrain of the plot is complex and varied. Rock  
230 exposure exceeds 60% and soil thickness >30 cm in most areas. In the first census, 108,667  
231 individuals in 227 species, 147 genera, and 61 families were recorded (Lan et al., 2016).  
232 The dominant species are *Cryptocarya microcarpa*, *Itoa orientalis*, *Platycarya longipes*, and  
233 *Lindera communis* (Lan et al., 2016).

234 The 20-ha Dinghu Mountain plot (“DH”; 23.10 °N, 112.32 °E), established in 2005,  
235 has an average annual temperature of 20.9 °C and average annual precipitation of 1927  
236 mm. This steep, subtropical evergreen forest spans an elevational range of 230–470 m with  
237 very steep slopes (30–50°). The first census recorded 71,617 individuals in 210 species, 119  
238 genera, and 56 families (Ye et al., 2008). The three canopy-dominant species in the plot are  
239 *Castanopsis chinensis*, *Schima superba* and *Engelhardtia roxburghiana*, whilst the sub-canopy  
240 is dominated by *Syzygium rehderianum* and *Craibiodendron scleranthum* var. *kwangtungense*  
241 (Ye et al., 2008).

242 The 15-ha Nonggang plot (“NG”; 22.45 °N, 106.95 °E), established in 2011, is in a  
243 hot-spot of biodiversity in China. This region is characterized by highly vulnerable and  
244 spectacular limestone karst systems. Average annual temperature at NG is 21.5 °C and  
245 average annual precipitation is 1350 mm. The first census recorded 66,718 individuals in  
246 223 species, 153 genera, and 54 families (Lan et al., 2016). Eight of the recorded species  
247 are protected throughout China, 30 are endemic to Guangxi province, and three were new  
248 records for China. Representative tree species in NG include *Excentrodendron tonkinense*,  
249 *Cephalomappa sinensis*, *Deutzianthus tonkinensis*, and *Garcinia paucinervis*.

250 The 20-ha Xishuangbanna plot (“XSBN”; 21.61 °N, 101.57 °E), established in 2007,  
251 is the southernmost CForBio site and is at the northern limit of typical southeast Asian  
252 tropical rain forests. It receives 1532 mm of precipitation annually and has an average  
253 annual temperature of 21 °C. The tropical seasonal rain forest in XSBN is one of the most

254 species-rich forest ecosystems in China. At the first census, 95,834 individuals in 468 species,  
255 213 genera, and 70 families were recorded (Lan et al., 2008). The canopy height of this forest  
256 is 50–60 m. The dominant emergent tree species is *Parashorea chinensis*. Subcanopy layers  
257 of the forest are dominated by *Sloanea tomentosa*, *Pometia pinata*, and *Pittosporopsis kerrii*.

## 258 **Tree census and measurement**

259 Standard ForestGEO procedures (Condit, 1995) have been used to collect data across  
260 all CForBio plots. All woody stems (free-standing trees, shrubs, and lianas) at least 1 cm  
261 in diameter at breast height (“DBH”; 1.3 m above the ground level) were tagged, measured,  
262 identified to species, and mapped. In all of the plots, the individuals have been censused  
263 every 5 years (initial census years in these 12 plots varied between 2004 and 2014; Table 1);  
264 we used the first census data from each plot in our analysis.

## 265 **The outlier criterion for identifying candidate foundation species**

266 Following Ellison et al. (2019), our first criterion for selecting candidate foundation tree  
267 species in each plot was to determine those species that were “outliers” from the typical  
268 “reverse-J” distribution of the size-frequency distribution of mean DBH plotted against the  
269 number of individuals. We identified outliers by eye rather than fitting a negative exponen-  
270 tial distribution with an arbitrary number of parameters to the 12 different size-frequency  
271 distributions. This initial screen revealed 2–14 candidate foundation tree species in each of  
272 the 12 forest dynamics plots (Fig. 1). The largest number of candidate species occurred in  
273 MLG and the fewest were in YLXS. To screen species more expansively and avoid missing  
274 other possible candidate foundation species, we also included in our first cut those ten species  
275 with the highest importance values ( $IV = \text{relative abundance} + \text{relative density} + \text{relative}$   
276  $\text{basal area}$ ) in each of the plots. Species that were outliers on the size-frequency plots usually  
277 had high importance values, but including the latter did expand our initial pool of candidate  
278 species to 10–14 species per plot (Table 2).



279

[Figure 1 about here.]

280

[Table 2 about here.]

## 281 **The diversity criterion for identifying candidate foundation species**

282 The second, more stringent criterion for identifying candidate foundation species is a neg-  
283 ative association between its size (or abundance), and total abundance, three measures of  
284 alpha diversity (species richness, Shannon diversity, Inverse Simpson Diversity) of associated  
285 woody species *and* a positive association between its size or abundance and beta diversity  
286 (Ellison et al., 2019). The three measures of alpha diversity treat all species identically  
287 (species richness), down-weight rare species (Shannon diversity), or down-weight common  
288 species (inverse Simpson diversity) within subplots. These associations also should be con-  
289 sistent across the plots when calculated at a given spatial grain (*a.k.a.* spatial scale) and at  
290 most (ideally all) spatial lags (Buckley et al., 2016*a*; Ellison et al., 2019).

## 291 **Forest structure and species diversity indices**

292 For each plot, we calculated the total basal area, mean basal area, and total number  
293 of individuals of each of the candidate foundation tree and shrub species (Table 3) within  
294 contiguous  $5 \times 5$ ,  $10 \times 10$ , and  $20 \times 20$ -m subplots. For species other than the candidate foun-  
295 dation species, we calculated their total abundance, species richness, Shannon and inverse  
296 Simpson diversity indices (as Hill numbers: Chao et al., 2014) and mean Bray-Curtis dissim-  
297 ilarity (overall methods as in Ellison et al., 2019). In all the analysis, we used only the main  
298 stem of each individuals (i.e., smaller stems of multi-stemmed individuals were excluded from  
299 the analyses). The `diversity()` and `vegdist()` functions in the `vegan` package (Oksanen  
300 et al., 2018) of the R software system (R Core Team, 2019) were used for calculating each  
301 diversity metric.



## 302 Codispersion analysis

303 Codispersion describes anisotropic spatial patterns (i.e., different expected values when  
304 measured in different directions) of co-occurring variables for given spatial lags and direc-  
305 tions (Cuevas et al., 2013). The codispersion coefficient ranges from  $-1$  to  $1$ , with positive  
306 values indicating a positive spatial association and negative values indicating a negative spa-  
307 tial association for a given spatial lag and direction. These values can be visualized with  
308 a codispersion graph (Vallejos et al., 2015). Buckley et al. (2016a) introduced codispersion  
309 analysis to ecologists through an exploration of spatial patterns of species co-occurrence.  
310 That paper also provides a basic introduction to the mathematics of codispersion analysis  
311 and codispersion graphs. Buckley et al. (2016b) used codispersion analysis to examine spa-  
312 tial patterns of relationships between environmental characteristics and known or candidate  
313 foundation tree species. Ellison et al. (2019) used codispersion analysis to quantify spatial  
314 effects of candidate foundation tree species on different measures of diversity of associated  
315 woody species in six forest dynamics plots in the Americas.

316 Although we computed codispersion patterns using mean basal area, total basal area,  
317 and total abundance of candidate foundation species, we focus our presentation on the  
318 codispersion between the total basal area of the candidate foundation species and associated  
319 woody plant diversity in the differently-sized ( $5 \times 5$ ,  $10 \times 10$ , and  $20 \times 20$ -m subplots)  
320 contiguous subplots in each of the 12 forest dynamics plots (Ellison et al., 2019); qualitatively  
321 similar patterns were observed when using mean basal area or total numbers of individuals of  
322 candidate foundation species. For each candidate foundation tree species, we first computed  
323 the observed codispersion coefficient between its total basal area and abundance, alpha, and  
324 beta diversity of the associated woody species in the subplots. The maximum spatial lag  
325 examined for each plot ranged from the length of the subplot to one-fourth of the length  
326 of the shortest side of each forest plot, which ensured adequate sample sizes for reliable  
327 estimation of codispersion coefficients at the largest spatial lag (Buckley et al., 2016a).

328 Statistical significance of the codispersion coefficients was determined using null model

329 analysis (Buckley et al., 2016b; Ellison et al., 2019). Codispersion coefficients for all spatial  
330 lags and directions were computed for co-occurrence matrices randomized using a toroidal-  
331 shift null model, which maintains the autocorrelation structure of the species and spatial  
332 patterns caused by underlying environmental gradients while shifting the associated woody  
333 species in random directions and distances (Buckley et al., 2016b; Ellison et al., 2019). For  
334 each candidate foundation species in each plot, we ran 199 randomizations; significance  
335 was determined based on empirical 95% confidence bounds. Calculation of codispersion  
336 coefficients and all randomizations were done using custom C and R code written by Ronny  
337 Vallejos and Hannah Buckley, respectively.

## 338 Data and code availability

339 Each of the CForBio plots were established at different times and are scheduled to be (or  
340 already have been) censused every five years. To maximize comparability among datasets, we  
341 used data collected at the first census for each plot (Table 1). All datasets are available from  
342 the ForestGEO data portal (<https://ctfs.si.edu/datarequest>). R code for all analyses  
343 is available on GitHub ([https://github.com/buckleyhannah/FS\\_diversity](https://github.com/buckleyhannah/FS_diversity)).

## 344 Results

### 345 Candidate foundation species in the CForBio plots

346 Only two species—the shrub *Acer barbinerve* (Fig. 2, 3) and the congeneric tree *Acer*  
347 *ukurunduense* (Fig. 4, 5)—in one plot—MLG—satisfied both the outlier *and* diversity cri-  
348 teria for all diversity measures for candidate foundation species (Figs. 2–5). For these two  
349 species in MLG, both criteria were met only at the 5-m spatial grain (Table 3).

350 [Figure 2 about here.]

351 [Figure 3 about here.]

352 [Figure 4 about here.]

353 [Figure 5 about here.]

354 [Table 3 about here.]

355 More species were considered as candidate foundation species when we retained the out-  
356 lier criterion (Fig. 1) but relaxed the diversity criterion to require only a positive spatial  
357 relationship between the size of the candidate foundation species and beta diversity *and* a  
358 negative spatial relationship between the size of the candidate foundation species and at  
359 least one of the alpha-diversity measures (species indicated with an asterisk [\*] in Table 3).  
360 These additional candidate foundation species included two additional *Acer* species, tree  
361 species in the genera *Pinus*, *Taxus*, *Fraxinus*, *Quercus*, and *Tilia*, and two shrubs (*Corylus*  
362 *mandshurica* and *Aporusa yunnanensis*). However, whether we applied the stringent or re-  
363 laxed diversity criterion, all but three of the candidate foundation species occurred in plots  
364 with cool- or cold-temperate climates. The exceptions were the trees *Pinus massoniana* and  
365 *Quercus serrata* var. *brevipetiolata* at GT and *Aporusa yunnanensis* at DH; all three of these  
366 species occurred in the subtropical evergreen broad-leaved forest plots.

367 A few of our initial candidate species that had high importance values but were not  
368 outliers from the expected size-frequency distributions (unstarred species in Table 2) did  
369 partially meet the diversity criterion in both temperate and tropical plots (Table 3). These  
370 included *Syringa reticulata* var. *amurensis* at CB, *Juglans mandshurica* at DL, *Machilus*  
371 *thunbergii* at GT, *Brassaiopsis glomerulata* at ML, *Ficus hispida* at NG, and *Mezzettiopsis*  
372 *creaghii* at XSBN.

### 373 **Scale-dependence of candidate foundation species**

374 More candidate foundation species—including all species that met at least one of the two  
375 criteria—were identified at smaller spatial grains: 15 species at the 5-m grain, 11 at the 10-m  
376 grain, and six at the 20-m grain (Table 3). This pattern applied both among and within the

377 plots. Average codispersion between total basal area of the candidate foundation species and  
378 Bray-Curtis dissimilarity increased significantly with spatial grain (Fig. 6; raw data in Table  
379 4). In contrast, average codispersion between total basal area of the candidate foundation  
380 species and measures of alpha diversity, while generally negative, were more variable and not  
381 scale-dependent (Fig. 6; raw data in Table 4).

382 [Figure 6 about here.]

### 383 **Candidate foundation species across a latitudinal gradient**

384 Both the number of woody species in each plot that were outliers from the expected  
385 size-frequency distribution and the number of candidate foundation species increased with  
386 increasing latitude (Fig. 7A, C; slopes = 0.3 and 0.15 species/degree of latitude, respectively;  
387  $P < 0.01$ ). As expected, within-plot species richness declined significantly with latitude (slope  
388 =  $-10.2$  species/degree of latitude,  $P < 0.01$ ), but this relationship was unrelated to the  
389 latitudinal pattern in either the number of outliers or the number of candidate foundation  
390 species. There were no significant relationships between either the number of outliers or the  
391 number of candidate foundation species and within-plot species richness (Fig. 7B, D;  $P =$   
392 0.08 and 0.18 respectively).

393 [Figure 7 about here.]

394 Spatial association (expressed as codispersion) within each plot between candidate foun-  
395 dation species and total abundance, mean alpha diversities, and mean beta diversity of  
396 associated woody species on average did not vary with latitude at any spatial grain (Fig.  
397 8; raw data in Table 4). Quantile regression (to account for potential extreme effects of  
398 foundation species) yielded similar results. There were no observed latitudinal patterns in  
399 effects of candidate foundation species except for a slight strengthening of the negative effect  
400 of candidate foundation species on associated woody species richness and total abundance

401 at the 5-m grain (Fig. 8,  $P = 0.04$ ). Similar results were obtained when understory shrubs  
402 were excluded from the analysis (Fig. 9).

403 [Figure 8 about here.]

404 [Figure 9 about here.]

## 405 Discussion

406 We applied two new statistical criteria (Ellison et al., 2019) to screen 12 of the 17 CForBio  
407 Forest Dynamic plots in China for candidate foundation species. These 12 plots ranged  
408 from 47 to 21 °N latitude, represented boreal, conifer-dominated, broad-leaved deciduous,  
409 subtropical, and tropical forests (Table 1), and included two forest types referred to by  
410 particular species (“Korean pine” mixed forests at Liangshi and Changbai Mountain, and the  
411 “*Taxus cuspidata*” mixed coniferous forest at Muling). Such eponyms do suggest traditional  
412 or cultural-based knowledge of foundation (or other “important”) species (Ellison et al.,  
413 2005; Ellison, 2019). Whilst both Korean pine (*Pinus koraiensis*) and *Taxus cuspidata* were  
414 identified as candidate foundation species (Table 3), they were only candidates in the Muling  
415 *Taxus cuspidata*-dominated forest plot, not in either of the “Korean pine” mixed forests. We  
416 also found a strong latitudinal gradient, unrelated to the expected (and observed) underlying  
417 latitudinal gradient in woody plant species richness, in the number of candidate foundation  
418 species, which were more frequent in temperate than in tropical forest plots (Fig. 7). Where  
419 they occurred, candidate foundation species had comparable effects at all latitudes (Figs.  
420 8, 9), suggesting that foundation species effects more likely reflect specific combinations of  
421 traits and interspecific effects rather than being manifestations of “neutral” (sensu Hubbell,  
422 2001) processes (Ellison et al., 2019).

## 423 **Candidate foundation species are more common in temperate lati-** 424 **tudes**

425 Foundation species in forests control species diversity locally within forest stands and at  
426 landscape and larger scales by creating habitat for associated flora (e.g., epiphylls, epiphytes,  
427 vines, lianas) and modifying soil structure and composition (e.g., Ellison et al., 2005; Brant-  
428 ley et al., 2013; Baiser et al., 2013; Vallejos et al., 2018; Degrassi et al., 2019; Ellison, 2019).  
429 Forest foundation species frequently are common, abundant, large trees (e.g., Schweitzer  
430 et al., 2004; Ellison et al., 2005; Whitham et al., 2006; Tomback et al., 2016; Ellison et al.,  
431 2019), but understory shrubs and treelets also can have foundational characteristics (Kane  
432 et al., 2011; Ellison and Degrassi, 2017; Ellison et al., 2019). Ellison et al. (2005) hypoth-  
433 esized that foundation species would be more likely in temperate forests because of their  
434 relatively low species richness and more frequent dominance by one or a small number of  
435 taxa. In contrast, tropical forests should lack foundation species as they are speciose and are  
436 dominated less frequently by a small number of taxa. Our data supported this hypothesis:  
437 candidate foundation species in the CForBio plots were more common at higher latitudes  
438 than in the tropics (Fig. 7; Ellison et al., 2019). This pattern also may reflect the greater  
439 importance of deterministic “niche” processes in temperate forests versus the stronger role  
440 of “neutral” dynamics in tropical ones (Gravel et al., 2006; Qiao et al., 2015).

441 We hypothesize that tropical forests dominated by a one or a few closely-related species,  
442 such as coastal mangrove forests dominated by *Rhizophora* spp. (Tomlinson, 1995) and mon-  
443 odominant tropical lowland forests dominated by species of Dipterocarpaceae in southeast  
444 Asia or species of Leguminosae (subfamily Caesalpinioideae) in Africa and the Neotropics  
445 (Torti et al., 2001; Hall et al., 2019) may be structured by foundation species (Ellison et al.,  
446 2005). Indeed, *Gilbertiodendron dewevrei* in the Ituri ForestGeo plot in the Democratic  
447 Republic of Congo (Makana et al., 2004*a,b*) has functional characteristics similar to *Tsuga*  
448 *canadensis* in northeastern US forests. *Gilbertiodendron* casts deep shade; produces leaf  
449 litter that decomposes very slowly, creating a dense and deep litter layer; creates soils with

450  $\approx 30\%$  of the available nitrogen (ammonium + nitrate) relative to nearby mixed forests; and  
451 has a depauperate (albeit not unique) fauna of leaf-litter ants and mites (Torti et al., 2001).  
452 Analysis of species distribution and diversity associated with potential foundation species in  
453 Southeast Asian forests dominated by Dipterocarpaceae, such as the ForestGeo 50-ha Pasoh  
454 plot in Malaysia (Kochummen et al., 1991; Ashton et al., 2003) versus others lacking abun-  
455 dant dipterocarps, such as the 30-ha ForestGeo Mo Singto plot in Thailand (Brockelman  
456 et al., 2011) or the 2-ha plot in Aluoi, Vietnam (Nguyen et al., 2016) would provide useful  
457 comparisons with the analyses of the CForBio plots—especially the 20-ha Xishuangbanna  
458 plot—presented here.

459 Conversely, the mid-latitude peak in functional-trait diversity of trees (Lamanna et al.,  
460 2014) led Ellison et al. (2019) to hypothesize that foundation tree species should be less  
461 common in boreal forests at high latitudes or at high elevations in lower latitudes than  
462 in more temperate ones. Our data showing no candidate foundation species at the high-  
463 elevation but low-latitude Yulong Snow Mountain plot support this hypothesis (Table 3).  
464 In other high-elevation and high-latitude boreal ecosystems, foundation species tend to be  
465 low-growing perennial, cushion- or tussock-forming plants (e.g., Ellison and Deggrasi, 2017;  
466 Elumeeva et al., 2017).

## 467 **Foundation species effects are scale-dependent at landscape, not** 468 **local scales**

469 Ellison (2019) argued that foundation species increase “patchiness” (beta diversity) at  
470 landscape scales, and that this effect of foundation species is of paramount importance when  
471 considering whether and how to conserve or otherwise manage them (see also Ellison et al.,  
472 2019). Across the 12 CForBio plots, we observed an increase in the strength of foundation  
473 species effects on beta diversity, expressed as a significant increase in codispersion between  
474 the candidate foundation species and diversity of associated species, at increasingly larger  
475 spatial grain (Fig. 6). At the 20-m grain, the magnitude of the codispersion coefficient

476 approached that of many of the candidate foundation species in ForestGeo plots in the  
477 Americas (0.25–0.35; Fig. 6), but still less than the very strong effects of *T. canadensis* in  
478 northeastern US forests (Ellison et al., 2019).

479 Conversely, although foundation species can provide habitat for associated species, thus  
480 increasing their local diversity, the opposite pattern and magnitude of effects has been found  
481 when analyzing only associated woody plant species in forest dynamic plots (Buckley et al.,  
482 2016a; Ellison et al., 2019) because foundation species occupy most of the available space. In  
483 the CForBio plots, codispersion similarly was negative between candidate foundation species  
484 and alpha diversity of associated woody plants (Figs. 2–6), but this relationship did not vary  
485 significantly with spatial grain (Fig. 6). Additional data on faunal groups (e.g., Sackett et al.,  
486 2011; Record et al., 2018) or non-woody plants (e.g., Ellison et al., 2016) could provide a  
487 test of whether these candidate foundation species have a positive effect on other associated  
488 species that are not competing for space with canopy or subcanopy trees, but such data  
489 are collected rarely in forest dynamic plots (but see Schowalter, 1994; Ruchty et al., 2001;  
490 Ellison, 2018).

### 491 ***Acer* as a candidate foundation genus**

492 In this study, four species of *Acer* were candidate foundation species among the three  
493 cold-temperate plots in China (Liangshi, Muling, and Changbai: Table 3). Among these, *A.*  
494 *ukurunduense* and *A. barbinerve* were the only two of all our candidate foundation species  
495 that met the most stringent criteria for consideration. In a comparable study across a  
496 latitudinal gradient in the Americas, *A. circinatum* was identified as a candidate foundation  
497 species in the the Wind River ForestGeo plot in Washington State, USA (Ellison et al., 2019).  
498 We hypothesize that in many forests throughout the Northern Hemisphere, that *Acer* not  
499 only can be a dominant genus in terms of abundance or total basal area, but that it may  
500 function as a foundation genus, akin to *Quercus* in the Tyson ForestGEO plot in central  
501 North America (Ellison et al., 2019).



502 *Acer* species often are common and abundant in temperate deciduous broad-leaved, conif-  
503 erous, and mixed forests throughout the Holarctic (Tiffney, 1985; Pennington et al., 2004),  
504 and in subtropical montane forests in China (Xu, 1996). *Acer* includes  $\approx 150$  species (WFO  
505 (World Flora Online), 2020), at least 99 of which (including 61 endemics) occur in China (Xu  
506 et al., 2008) and more than a dozen are found in North America (Alden, 1995). *Acer* species  
507 generally are shade tolerant, (i.e., they can regenerate and grow under closed canopies) and  
508 have relatively high seedling and sapling survival rates (Tanaka et al., 2008). Some more  
509 shade-intolerant (“photophilous”) early-successional *Acer* species create conditions that fa-  
510 cilitate restoration of both later successional forests and their associated animal assemblages  
511 (Zhang et al., 2010).

512 There are several forests named after *Acer* species in China, including the *Acer mono-*  
513 *Tilia amurensis-T. mandshurica* temperate broad-leaved deciduous forest, the *Schima superba-*  
514 *Acer caudatum-Toxicodendron succedaneum* eastern subtropical forest, and the *Cyclobal-*  
515 *anopsis multinervis-Castanopsis eyrel* var. *caudata-Liquidambar acalycina-Acer sinense*  
516 forest in southwest China (Wu, 1995). *Acer* also are considered primary “companion” species  
517 in Chinese *Quercus* and mixed broad-leaved-Korean pine forests where multiple *Acer* species  
518 co-occur. For example, six–seven additional *Acer* species were recorded with the three can-  
519 didate foundation *Acer* species in the two broad-leaved-Korean pine mixed forests plots (LS,  
520 CB). The nine *Acer* species in the CB plot account for  $\approx 46\%$  of the total stems (Zhang et al.,  
521 2010).

522 In North American forests, *Acer* species also define several forest types, including “Sugar  
523 Maple” (i.e., *A. saccharum*), “Sugar Maple–Beech–Yellow Birch”, “Sugar Maple–Basswood”,  
524 “Red Maple” (i.e., *A. rubrum*), and “Silver Maple–American Elm” (i.e., *A. saccharinum*)  
525 (Eyre, 1980). In forests of the Pacific Northwest of North America, the subcanopy treelet *A.*  
526 *circinatum* not only grows rapidly, has high biomass, and forms broad canopies that suppress  
527 other species (Lutz and Halpern, 2006; Halpern and Lutz, 2013), which causes it to have  
528 negative codispersion with other woody taxa (Ellison et al., 2019), but it also supports a high

529 diversity of epiphytes (Ruchty et al., 2001). Another North American species, *A. sacchar-*  
530 *inum*, dominates floodplain forests on well-drained alluvial soils in the eastern U.S. (Gabriel,  
531 1990). Although Vankat (1990) subsumed “Silver Maple–American Elm” forests within a  
532 “Mixed Hardwood Wetland Forest” type and considered *A. saccharinum* to be only a minor  
533 component of these forests, this species historically was a significant constituent of at least  
534 some primary forests in the upper Midwestern U.S. and Canada (Cho and Boerner, 1995;  
535 Simard and Bouchard, 1996; Guyon and Battaglia, 2018); supports unique assemblages of  
536 birds (Yetter et al., 1999; Knutson et al., 2005; Kirsch and Wellik, 2017); and, among woody  
537 species, contributes substantially to carbon fixation in tidal wetlands (Milligan et al., 2019).  
538 *Acer saccharinum* may be similar to other North American (candidate) foundation species  
539 whose effects are most pronounced at different successional stages (Ellison et al., 2014, 2019).  
540 However, we know of no large plots in either “Silver Maple–American Elm” or “Mixed Hard-  
541 wood Wetland” forests from which we could derive data to test whether *A. saccharinum*  
542 meets our statistical criteria for candidate foundation species. Whilst it may be premature  
543 to establish large forest dynamics plots in floodplains in either the temperate zone or the  
544 tropics, or in tropical coastal habitats with low tree diversity, comparable data could be used  
545 to test more general ideas about the foundational importance of particular genera, such as  
546 *Acer* or *Rhizophora*, in forested wetlands worldwide.

## 547 **Acknowledgments**

548 This study was supported by the Strategic Priority Research Program of the Chinese  
549 Academy of Sciences (XDB31000000), the National Natural Science Foundation of China  
550 (31740551, 31270562, 31660130, 31760131), the National Key Research and Development  
551 Program of China (2016YFC0502405), the Guangxi Key Research and Development Pro-  
552 gram (AB17129009), Natural Science Foundation of Heilongjiang (CN) (QC2018025), and  
553 the Harvard Forest. We acknowledge the Chinese Forest Biodiversity Monitoring Network

554 (CForBio) for installing and supporting the forest dynamic plots in China, and all the field  
555 technicians and students who have helped census the plots. Audrey Barker Plotkin, Brian  
556 Hall, Helen Murphy, Dave Orwig, Neil Pederson, and Jonathan Thompson provided con-  
557 structive comments and feedback on early versions of the manuscript.

## 558 **Author contributions**

559 XQ and AME conceptualized and designed the study and wrote the manuscript; XQ  
560 and all the other authors collected the data at the individual CForBio plots. All authors  
561 contributed critically to the drafts and gave final approval for publication.

## 562 **Conflict of interest**

563 The authors declare no conflicts of interest.

## 564 **References**

- 565 Alden, H. A., 1995. Hardwoods of North America. Technical Report FPL-GTR-83, U.S.  
566 Department of Agriculture, Forest Service, Madison, Wisconsin, USA.
- 567 Ashton, P. S., J. V. LaFrankie, M. N. N. Supardi, and S. J. Davies, 2003. The trees of  
568 Pasoh Forest: stand structure and floristic composition of the 50-ha forest research plot.  
569 Pages 35–50 *in* T. Okuda, N. Manokaran, Y. Matsumoto, K. Niiyama, S. C. Thomas,  
570 and P. S. Ashton, editors. Pasoh: Ecology of a Lowland Rain Forest in Southeast Asia.  
571 Springer-Verlag, Tokyo, Japan.
- 572 Baiser, B., N. Whitaker, and A. M. Ellison. 2013. Modeling foundation species in food webs.  
573 *Ecosphere* 4:146.

- 574 Brantley, S. T., C. R. Ford, and J. M. Vose. 2013. Future species composition will affect  
575 forest water use after loss of eastern hemlock from southern Appalachian forests. *Ecological*  
576 *Applications* **23**:777–790.
- 577 Brockelman, W. Y., A. Nathalang, and G. A. Gale. 2011. The Mo Singto forest dynamics  
578 plot, Khao Yai National Park, Thailand. *Natural History Bulletin of the Siam Society*  
579 **57**:35–55.
- 580 Buckley, H. L., B. S. Case, and A. M. Ellison. 2016*a*. Using codispersion analysis to  
581 characterize spatial patterns in species co-occurrences. *Ecology* **97**:32–39.
- 582 Buckley, H. L., B. S. Case, J. Zimmermann, J. Thompson, J. A. Myers, and A. M. Ellison.  
583 2016*b*. Using codispersion analysis to quantify and understand spatial patterns in species-  
584 environment relationships. *New Phytologist* **211**:735–749.
- 585 Case, B. S., H. L. Buckley, A. Barker Plotkin, and A. M. Ellison. 2016. Using codispersion  
586 analysis to quantify temporal changes in the spatial pattern of forest stand structure.  
587 *Chilean Journal of Statistics* **7**:3–15.
- 588 Chao, A., N. J. Gotelli, T. C. Hsieh, E. L. Snader, K. H. Ma, R. K. Colwell, and A. M. Ellison.  
589 2014. Rarefaction and extrapolation with Hill numbers: a framework for sampling and  
590 estimation in species diversity studies. *Ecological Monographs* **84**:45–67.
- 591 Cho, D. S., and R. E. J. Boerner. 1995. Dendrochronological analysis of the canopy history  
592 of two Ohio old-growth forests. *Vegetatio* **120**:173–183.
- 593 Condit, R. 1995. Research in large, long-term tropical forest plots. *Trends in Ecology &*  
594 *Evolution* **10**:18 – 22.
- 595 Cuevas, F., E. Porcu, and R. Vallejos. 2013. Study of spatial relationships between two sets  
596 of variables: a nonparametric approach. *Journal of Nonparametric Statistics* **25**:695–714.

- 597 Degrassi, A. L., S. Brantley, C. R. Levine, J. Mohan, S. Record, D. F. Tomback, and A. M.  
598 Ellison. 2019. Loss of foundation species revisited: conceptual framework with lessons  
599 learned from eastern hemlock and whitebark pine. *Ecosphere* **10**:e02917.
- 600 Diao, Y., G. Jin, S. Tian, Y. Liu, Y. Liu, L. Han, and Y. Li. 2016. Species composition and  
601 community structure of a *Taxus cuspidata* forest in Muling Nature Reserve of Heilongjiang  
602 Province, China. *Scientia Silvae Sinica* **52**:26–36.
- 603 Ellison, A. M. 2014. Experiments are revealing a foundation species: a case-study of eastern  
604 hemlock (*Tsuga canadensis*). *Advances in Ecology* **2014**:article 456904.
- 605 Ellison, A. M. 2018. Ants of the CTFS-ForestGEO Plot at Harvard Forest  
606 2018. Harvard Forest Data Archive **HF310**:[https://dx.doi.org/10.6073/pasta/  
607 5799146b9c4b003e57227f6f4cf08564](https://dx.doi.org/10.6073/pasta/5799146b9c4b003e57227f6f4cf08564).
- 608 Ellison, A. M. 2019. Foundation Species, non-trophic interactions, and the value of being  
609 common. *iScience* **13**:254–268.
- 610 Ellison, A. M., M. S. Bank, B. D. Clinton, E. A. Colburn, K. Elliott, C. R. Ford, D. R. Foster,  
611 B. D. Kloeppel, J. D. Knoepp, G. M. Lovett, J. Mohan, D. A. Orwig, N. L. Rodenhouse,  
612 W. V. Sobczak, K. A. Stinson, J. K. Stone, C. M. Swan, J. Thompson, B. Von Holle,  
613 and J. R. Webster. 2005. Loss of foundation species: consequences for the structure and  
614 dynamics of forested ecosystems. *Frontiers in Ecology and the Environment* **3**:479–486.
- 615 Ellison, A. M., A. A. Barker Plotkin, and S. Khalid. 2016. Foundation species loss and  
616 biodiversity of the herbaceous layer in New England forests. *Forests* **7**:9.
- 617 Ellison, A. M., H. L. Buckley, B. S. Case, D. Cardenas, A. J. Duque, J. A. Lutz, J. A. Myers,  
618 D. A. Orwig, , and J. K. Zimmerman. 2019. Species diversity associated with foundation  
619 species in temperate and tropical forests. *Forests* **10**:128.

- 620 Ellison, A. M., and A. L. Deggrasi. 2017. All species are important, but some species are  
621 more important than others. *Journal of Vegetation Science* **28**:669–671.
- 622 Ellison, A. M., M. Lavine, P. B. Kerson, A. A. B. Plotkin, and D. A. Orwig. 2014. Building a  
623 foundation: land-use history and dendrochronology reveal temporal dynamics of a *Tsuga*  
624 *canadensis* (Pinaceae) forest. *Rhodora* **116**:377–427.
- 625 Elumeeva, T. G., V. G. Onipchenko, and M. J. A. Weger. 2017. No other species can replace  
626 them: evidence for the key role of dominants in an alpine *Festuca varia* grassland. *Journal*  
627 *of Vegetation Science* **28**:674–683.
- 628 Eyre, F. H. 1980. *Forest Cover Types of the United States and Canada*. Society of American  
629 Foresters, Washington, DC, USA.
- 630 Gabriel, W. J., 1990. *Acer saccharinum* L. – Silver Maple. Page [https://www.srs.fs.usda.](https://www.srs.fs.usda.gov/pubs/misc/ag_654/volume_2/acer/saccharinum.htm)  
631 [gov/pubs/misc/ag\\_654/volume\\_2/acer/saccharinum.htm](https://www.srs.fs.usda.gov/pubs/misc/ag_654/volume_2/acer/saccharinum.htm) in R. M. Burns and B. H.  
632 Honkala, editors. *Silvics of North America: 2. Hardwoods*. U.S. Department of Agriculture,  
633 Forest Service, Washington, DC, USA.
- 634 Gaston, K. J., and R. A. Fuller. 2007. Biodiversity and extinction: losing the common and  
635 the widespread. *Progress in Physical Geography* **31**:213–225.
- 636 Gaston, K. J., and R. A. Fuller. 2008. Commonness, population depletion and conservation  
637 biology. *Trends in Ecology & Evolution* **23**:14–19.
- 638 Gravel, D., C. D. Canham, M. Beaudet, and C. Messier. 2006. Reconciling niche and  
639 neutrality: the continuum hypothesis. *Ecology Letters* **9**:399–409.
- 640 Grime, J. P., 1987. Dominant and subordinate components of plant communities: implica-  
641 tions for succession, stability and diversity. Pages 413–428 in A. J. Gray, M. J. Crawley,  
642 and P. J. Edwards, editors. *Colonization, Succession and Stability*. Blackwell Scientific  
643 Publications, Oxford, UK.

- 644 Guyon, L. J., and L. L. Battaglia. 2018. Ecological characteristics of floodplain forest  
645 reference sites in the Upper Mississippi River System. *Forest Ecology and Management*  
646 **427**:208–216.
- 647 Hall, J. S., D. J. Harris, K. Saltonstall, V. Mdjibe, M. S. Ashton, and B. L. Turner. 2019.  
648 Resource acquisition strategies facilitate *Gilbertiodendron dewevrei* monodominance in  
649 African lowland forests. *Journal of Ecology* pages doi:10.1111/1365-2745.13278.
- 650 Halpern, C. B., and J. A. Lutz. 2013. Canopy closure exerts weak controls on understory  
651 dynamics: a 30-year study of overstory-understory interactions. *Ecological Monographs*  
652 **83**:221–237.
- 653 Hao, Z., B. Li, J. Zhang, X. Wang, J. Ye, and X. Yao. 2008. Broad-leaved Korean pine (*Pinus*  
654 *koraiensis*) mixed forest plot in Changbaishan (CBS) of China: community composition  
655 and structure. *Plant Ecology Journal* **32**:238–250.
- 656 Huang, H., Z. Chen, D. Liu, G. He, R. He, D. Li, and K. Xu. 2017. Species composition  
657 and community structure of the Yulongxueshan (Jade Dragon Snow Mountains) forest  
658 dynamics plot in the cold temperate spruce-fir forest, Southwest China. *Biodiversity*  
659 *Science* **25**:255–264.
- 660 Hubbell, S. P. 2001. *The Unified Neutral Theory of Biodiversity and Biogeography*. Princeton  
661 University Press, Princeton, New Jersey, USA.
- 662 Kane, J. M., K. A. Meinhardt, T. Chang, B. L. Cardall, R. Michalet, and W. T. G. 2011.  
663 Drought-induced mortality of a foundation species (*Juniperus monosperma*) promotes pos-  
664 itive afterlife effects in understory vegetation. *Plant Ecology* **212**:733–741.
- 665 Kirsch, E. M., and M. J. Wellik. 2017. Tree species preferences of foraging songbirds during  
666 spring migration in floodplain forests of the Upper Mississippi River. *American Midland*  
667 *Naturalist* **177**:226–249.

- 668 Knutson, M. G., L. E. McColl, and S. A. Suarez. 2005. Breeding bird assemblages associated  
669 with stages of forest succession in large river floodplains. *Natural Areas Journal* **25**:55–70.
- 670 Kochummen, K. M., J. V. LaFrankie, and N. Manokaran. 1991. Floristic composition of  
671 Pasoh Forest Reserve, a lowland rain forest in Peninsular Malaysia. *Journal of Tropical*  
672 *Forest Science* **3**:1–13.
- 673 Lamanna, C., B. Blonder, C. Violle, N. J. B. Kraft, B. Sandel, I. Šímová, J. C. I.  
674 Donoghue, J.-C. Svenning, B. J. McGill, B. Boyle, V. Buzzard, S. Dolins, P. M. Jørgensen,  
675 A. Marcuse-Kubitzka, N. Morueta-Holme, R. K. Peet, W. H. Piel, J. Regetz, M. Schild-  
676 hauer, N. Spencer, B. Thiers, S. K. Wisser, and B. J. Enquist. 2014. Functional trait space  
677 and the latitudinal diversity gradient. *Proceedings of the National Academy of Science,*  
678 *USA* **111**:13475–13750.
- 679 Lan, G., Y. Hu, M. Cao, H. Zhu, H. Wang, S. Zhou, X. Deng, J. Cui, J. Huang, L. Liu, H. Xu,  
680 J. Song, and Y. He. 2008. Establishment of Xishuangbanna tropical forest dynamics plot:  
681 species compositions and spatial distribution patterns. *Plant Ecology Journal* **32**:287–298.
- 682 Lan, S., M. Song, F. Zeng, H. Du, W. Peng, W. Qin, and T. He. 2016. Species composition of  
683 woody plants in evergreen-deciduous broad-leaved karst forests, Southern China. *Guihaia*  
684 **36**:1156–1164.
- 685 Legendre, P., X. Mi, H. Ren, K. Ma, M. Yu, I.-F. Sun, and F. He. 2009. Partitioning beta  
686 diversity in a subtropical broad-leaved forest of China. *Ecology* **90**:663–674.
- 687 Liu, H., L. Li, and W. Sang. 2011. Species composition and community structure of the  
688 Donglingshan forest dynamic plot in a warm temperate deciduous broad-leaved secondary  
689 forest, China. *Biodiversity Science* **19**:232–242.
- 690 Liu, Y., F. Li, and G. Jin. 2014. Spatial patterns and associations of four species in an  
691 old-growth temperate forest. *Journal of Plant Interactions* **9**:745–753.



- 692 Loehle, C. 2006. Species abundance distributions result from body size-energetics relation-  
693 ships. *Ecology* **87**:2221–2226.
- 694 Lu, Z., D. Bao, Y. Guo, J. Lu, Q. Wang, D. He, K. Zhang, Y. Xu, H. Liu, H. Meng, H. Huang,  
695 L. J. Wei, Xinzeng, X. Qiao, M. Jiang, Z. Gu, and C. Liao. 2013. Community composition  
696 and structure of Badagongshan (BDGS) forest dynamic plot in a mid-subtropical mountain  
697 evergreen and deciduous broad-leaved mixed forest, central China. *Plant Science Journal*  
698 **31**:336.
- 699 Lutz, J. A., and C. B. Halpern. 2006. Tree mortality during early forest development: a  
700 long-term study of rates, causes, and consequences. *Ecological Monographs* **76**:257–275.
- 701 Makana, J.-R., T. B. Hart, C. E. N. Ewango, I. Liengola, J. A. Hart, and R. Condit, 2004*a*.  
702 Ituri Forest Dynamics Plots, Democratic Republic of Congo. Pages 492–505 *in* E. Losos  
703 and E. L. Jr., editors. *Tropical Forest Diversity and Dynamism: Findings from a Large-*  
704 *Scale Plot Network*. University of Chicago Press, Chicago, IL, USA.
- 705 Makana, J.-R., T. B. Hart, D. E. Hibbs, and R. Condit, 2004*b*. Stand structure and species  
706 diversity in the Ituri Forest Dynamics Plots: a comparison of monodominant and mixed  
707 forest stands. Pages 159–174 *in* E. Losos and E. L. Jr., editors. *Tropical Forest Diversity*  
708 *and Dynamism: Findings from a Large-Scale Plot Network*. University of Chicago Press,  
709 Chicago, IL, USA.
- 710 Milligan, G., H. M. Poulos, M. S. Gilmore, G. P. Berlyn, J. Milligan, and B. Chernoff. 2019.  
711 Estimation of short-term C-fixation in a New England temperate tidal freshwater wetland.  
712 *Heliyon* **5**:e01782.
- 713 Nguyen, H. H., J. Uria-Diez, and K. Wiegand. 2016. Spatial distribution and association  
714 patterns in a tropical evergreen broad-leaved forest of north-central Vietnam. *Journal of*  
715 *Vegetation Science* **27**:318–327.

- 716 Oksanen, J., F. G. Blanchet, M. Friendly, R. Kindt, P. Legendre, D. McGlinn, P. R. Minchin,  
717 R. B. O'Hara, G. L. Simpson, P. Solymos, M. H. H. Stevens, E. Szoecs, and H. Wag-  
718 ner, 2018. `vegan`: Community Ecology Package. URL [https://CRAN.R-project.org/  
719 package=vegan](https://CRAN.R-project.org/package=vegan).
- 720 Orwig, D. A., A. A. Barker Plotkin, E. A. Davidson, H. Lux, K. E. Savage, and A. M.  
721 Ellison. 2013. Foundation species loss affects vegetation structure more than ecosystem  
722 function in a northeastern USA forest. *PeerJ* **1**:e41.
- 723 Pennington, P. T., Q. C. B. Cronk, J. A. Richardson, M. J. Donoghue, and S. A. Smith. 2004.  
724 Patterns in the assembly of temperate forests around the Northern Hemisphere. *Philosophical  
725 Transactions of the Royal Society of London, B – Biological Sciences* **359**:1633–1644.
- 726 Qiao, X., F. Jabot, Z. Tang, M. Jiang, and J. Fang. 2015. A latitudinal gradient in tree com-  
727 munity assembly processes evidenced in Chinese forests. *Global Ecology and Biogeography*  
728 **24**:314–323.
- 729 Qin, Y., J. Zhang, J. Liu, M. Liu, D. Wan, H. Wu, Y. Zhou, H. Meng, Z. Xiao, H. Huang,  
730 Y. Xu, Z. Lu, X. Qiao, and M. Jiang. 2018. Community composition and spatial structure  
731 in the Badagongshan 25 ha Forest Dynamics Plot in Hunan Province. *Biodiversity Science*  
732 **26**:1016.
- 733 R Core Team, 2019. R: A Language and Environment for Statistical Computing. R Foun-  
734 dation for Statistical Computing, Vienna, Austria. URL <https://www.R-project.org>.
- 735 Record, S., T. McCabe, B. Baiser, and A. M. Ellison. 2018. Identifying foundation species  
736 in North American forests using long-term data on ant assemblage structure. *Ecosphere*  
737 **9**:e02139.
- 738 Ruchty, A., A. L. Rosso, and B. McCune. 2001. Changes in epiphyte communities as the  
739 shrub, *Acer circinatum*, develops and ages. *The Bryologist* **104**:274–281.

- 740 Sackett, T. E., S. Record, B. Bewick, S. and; Baiser, N. J. Sanders, and A. M. Ellison. 2011.  
741 Response of macroarthropod assemblages to the loss of hemlock (*Tsuga canadensis*), a  
742 foundation species. *Ecosphere* **2**:e74.
- 743 Schowalter, T. D. 1994. Invertebrate community structure and herbivory in a tropical rain  
744 forest canopy in Puerto Rico following Hurricane Hugo. *Biotropica* **26**:312–319.
- 745 Schweitzer, J. A., J. K. Bailey, B. J. Rehill, G. D. Martinsen, S. C. Hart, R. L. Lindroth,  
746 P. Keim, and T. G. Whitham. 2004. Genetically based trait in a dominant tree affects  
747 ecosystem processes. *Ecology Letters* **7**:127–134.
- 748 Simard, H., and A. Bouchard. 1996. The precolonial 19th century forest of the Upper  
749 St. Lawrence Region of Quebec: a record of its exploitation and transformation through  
750 notary deeds of wood sales. *Canadian Journal of Forest* **26**:1670–1676.
- 751 Tanaka, H., M. Shibata, T. Masaki, S. Iida, K. Niiyama, S. Abe, Y. Kominami, and  
752 T. Nakashizuka. 2008. Comparative demography of three coexisting *Acer* species in  
753 gaps and under closed canopy. *Journal of Vegetation Science* **19**:127–138.
- 754 Tiffney, B. H. 1985. Perspectives on the origin of the floristic similarity between eastern  
755 Asia and eastern North America. *Journal of the Arnold Arboretum* **66**:73–94.
- 756 Tomback, D. F., L. M. Resler, R. E. Keane, E. R. Pansing, A. J. Andrade, and A. C. Wagner.  
757 2016. Community structure, biodiversity, and ecosystem services in treeline whitebark pine  
758 communities: potential impacts from a non-native pathogen. *Forests* **7**:21.
- 759 Tomlinson, P. B. 1995. *The Botany of Mangroves*. Cambridge University Press, Cambridge,  
760 UK.
- 761 Torti, S. D., P. D. Coley, and T. A. Kursar. 2001. Causes and consequences of monodomi-  
762 nance in tropical lowland forests. *The American Naturalist* **157**:141–153.

- 763 Vallejos, R., H. Buckley, B. Case, J. Acosta, and A. M. Ellison. 2018. Sensitivity of codis-  
764 persion to noise and error in ecological and environmental data. *Forests* **9**:679.
- 765 Vallejos, R., F. Osorio, and D. Mancilla. 2015. The codispersion map: a graphical tool to  
766 visualize the association between two spatial processes. *Statistica Neerlandica* **69**:298–314.
- 767 Vankat, J. L. 1990. A classification of the forest types of North America. *Vegetatio* **88**:53–66.
- 768 Wang, X., T. Wiegand, Z. Hao, B. Li, J. Ye, and F. Lin. 2010. Species associations in an  
769 old-growth temperate forest in north-eastern China. *Journal of Ecology* **98**:674–686.
- 770 WFO (World Flora Online), 2020. *Acer* L. [http://www.worldfloraonline.org/taxon/  
771 wfo-4000000188](http://www.worldfloraonline.org/taxon/wfo-4000000188).
- 772 Whitham, T. G., J. K. Bailey, J. A. Schweitzer, S. M. Shuster, R. K. Bangert, C. J. LeRoy,  
773 E. V. Lonsdorf, G. J. Allan, S. P. DiFazio, B. M. Potts, D. G. Fischer, C. A. Gehring, R. L.  
774 Lindroth, J. C. Marks, S. C. Hart, G. M. Wimp, and S. C. Wooley. 2006. A framework for  
775 community and ecosystem genetics: from genes to ecosystems. *Nature Reviews Genetics*  
776 **7**:510–523.
- 777 Wu, Z. Y. 1995. *The vegetation of China [Zhongguo Zhibei]*. Science Press, Beijing, China.
- 778 Xu, L., and G. Jin. 2013. Species composition and community structure of a typical mixed  
779 broad-leaved-Korean pine (*Pinus koraiensis*) forest plot in Liangshui Nature Reserve,  
780 Northeast China. *Biodiversity Science* **20**:470–481.
- 781 Xu, T., Y. Chen, P. C. de Jong, H. J. Oterdoom, and C.-S. Chang, 2008. *Acer* Linneaus  
782 in *Flora of China*. [http://www.efloras.org/florataxon.aspx?flora\\_id=2&taxon\\_id=  
783 100167](http://www.efloras.org/florataxon.aspx?flora_id=2&taxon_id=100167).
- 784 Xu, T.-Z. 1996. Phytogeography of the family Aceraceae. *Acta Botanica Yunnanica* **18**:43–  
785 50.

- 786 Yan, E.-R., L.-L. Zhou, H. Chen, X. Wang, and X.-Y. Liu. 2018. Linking intraspecific trait  
787 variability and spatial patterns of subtropical trees. *Oecologia* **186**:793–803.
- 788 Yang, Q., Z. Ma, Y. Xie, Z. Zhang, Z. Wang, H. Liu, P. Li, N. Zhang, D. Wang, H. Yang,  
789 X. Fang, E. Yan, and X. Wang. 2011. Community structure and species composition of an  
790 evergreen broadleaved forest in Tiantong’s 20 ha dynamic plot, Zhejiang Province, eastern  
791 China. *Biodiversity Science* **19**:215–223.
- 792 Ye, W., H. Cao, Z. Huang, J. Lian, Z. Wang, L. Li, S. Wei, and Z. Wang. 2008. Community  
793 structure of a 20-ha lower subtropical evergreen broadleaved forest plot in Dinghushan,  
794 China. *Plant Ecology Journal* **32**:274–286.
- 795 Yetter, A. P., S. P. Havera, and C. S. Hine. 1999. Natural-cavity use by nesting wood ducks  
796 in Illinois. *Journal of Wildlife Management* **63**:630–638.
- 797 Zhang, J., B. Song, B.-H. Li, J. Ye, X.-G. Wang, and Z.-Q. Hao. 2010. Spatial patterns and  
798 associations of six congeneric species in an old-growth temperate forest. *Acta Oecologica*  
799 **36**:29–38.

## 800 **Supplementary Information**

801 Table 4. Codispersion statistics for all candidate foundation species listed in Table 3.

802 [Table 4 about here.]

Table 1: Geographic data for CForBio forest dynamics plots studied here. Latitude and longitude are in °N and °E, respectively; elevation is in meters above sea level (m a.s.l.); area is in hectares (ha), and census year is the year of the first census of the plot.

| Plot | Province     | Latitude | Longitude | Elevation | Vegetation type                                                            | Area (ha) | Census Year |
|------|--------------|----------|-----------|-----------|----------------------------------------------------------------------------|-----------|-------------|
| LS   | Heilongjiang | 47.18    | 128.88    | 467       | Broad-leaved Korean pine mixed forest                                      | 9         | 2010        |
| MLG  | Heilongjiang | 43.95    | 130.07    | 720       | <i>Taxus cuspidata</i> -dominated mixed coniferous forest                  | 25        | 2014        |
| CB   | Jinlin       | 42.38    | 128.08    | 802       | Deciduous broad-leaved Korean pine mixed forest                            | 25        | 2004        |
| DL   | Beijing      | 39.96    | 115.43    | 1395      | Deciduous broad-leaved forest                                              | 20        | 2010        |
| TT   | Zhejiang     | 29.80    | 121.80    | 454       | subtropical evergreen broad-leaved forest                                  | 20        | 2009        |
| BDG  | Hunan        | 29.77    | 110.09    | 1412      | Mid-subtropical mountain evergreen and deciduous broad-leaved mixed forest | 25        | 2011        |
| GT   | Zhejiang     | 29.25    | 118.12    | 581       | subtropical evergreen broad-leaved forest                                  | 24        | 2005        |
| YLXS | Yunnan       | 27.14    | 100.22    | 3282      | Cool-temperate spruce-fir forest                                           | 25        | 2014        |
| ML   | Guangxi      | 25.80    | 108.00    | 550       | Karst evergreen and deciduous broad-leaved mixed forest                    | 25        | 2014        |
| DH   | Guangdong    | 23.10    | 112.32    | 350       | lower subtropical evergreen broad-leaved forest                            | 20        | 2005        |
| NG   | Guangxi      | 22.45    | 106.95    | 260       | Karst seasonal rain forest                                                 | 15        | 2011        |
| XSBN | Yunnan       | 21.61    | 101.57    | 789       | Tropical rain forest                                                       | 20        | 2007        |

Table 2: Initial set of candidate foundation species identified as outliers in the abundance-DBH plots (Fig. 1; here marked with an asterisk[\*]) and others whose importance values (IV) were in the top ten for that plot. Plots are ordered by latitude, and within each plot, species are ordered by IV. Units of diameter (DBH) are cm and units of basal area (BA) are in m<sup>2</sup>/ha.

| Plot                                              | Species                                         | Abbreviation                  | Abundance | DBH   | BA     | Groups | IV (%) |
|---------------------------------------------------|-------------------------------------------------|-------------------------------|-----------|-------|--------|--------|--------|
| LS                                                | * <i>Pinus koraiensis</i>                       | PINKOR                        | 1200      | 42.8  | 24.15  | Canopy | 23.3   |
|                                                   | * <i>Corylus mandshurica</i>                    | CORMAN                        | 4617      | 2.1   | 0.38   | Shrub  | 10.5   |
|                                                   | * <i>Acer mono</i>                              | ACEMON                        | 2142      | 7.7   | 2.43   | Canopy | 8.3    |
|                                                   | <i>Acanthopanax senticosus</i>                  | ACASEN                        | 1937      | 1.6   | 0.07   | Shrub  | 5.1    |
|                                                   | * <i>Abies nephrolepis</i>                      | ABINEP                        | 905       | 16.2  | 3.01   | Canopy | 5.8    |
|                                                   | * <i>Tilia amurensis</i>                        | TILAMU                        | 728       | 13.4  | 3.01   | Canopy | 5.1    |
|                                                   | * <i>Acer ukurunduense</i>                      | ACEUKU                        | 1262      | 4.3   | 0.43   | Canopy | 4.4    |
|                                                   | * <i>Ulmus laciniata</i>                        | ULMLAC                        | 71        | 7.7   | 1.48   | Canopy | 4.7    |
|                                                   | <i>Euonymus pauciflorus</i>                     | EUOPAU                        | 1279      | 1.9   | 0.05   | Shrub  | 4.1    |
|                                                   | * <i>Acer tegmentosum</i>                       | ACETEG                        | 988       | 5.1   | 0.49   | Canopy | 3.4    |
|                                                   | * <i>Betula costata</i>                         | BETCOS                        | 601       | 1302  | 2.04   | Canopy | 3.4    |
|                                                   | * <i>Fraxinus mandshurica</i>                   | FRAMAN                        | 407       | 12.54 | 1.27   | Canopy | 2.4    |
|                                                   | MLG                                             | * <i>Tilia amurensis</i>      | TILAMU    | 3540  | 19.4   | 6.14   | Canopy |
| * <i>Acer mono</i>                                |                                                 | ACEMON                        | 3893      | 12.4  | 3.45   | Canopy | 7.9    |
| * <i>Corylus mandshurica</i>                      |                                                 | CORMAN                        | 9008      | 2.0   | 0.13   | Shrub  | 6.9    |
| * <i>Abies nephrolepis</i>                        |                                                 | ABINEP                        | 3596      | 14.1  | 3.07   | Canopy | 6.9    |
| * <i>Pinus koraiensis</i>                         |                                                 | PINKOR                        | 4820      | 9.1   | 2.15   | Canopy | 6.8    |
| * <i>Acer barbinerve</i>                          |                                                 | ACEBAR                        | 7498      | 3.2   | 0.32   | Shrub  | 6.7    |
| * <i>Acer tegmentosum</i>                         |                                                 | ACETAG                        | 3904      | 8.7   | 1.42   | Canopy | 5.8    |
| * <i>Betula costata</i>                           |                                                 | BETCOS                        | 1573      | 18.0  | 2.43   | Canopy | 5.1    |
| * <i>Acer ukurunduense</i>                        |                                                 | ACEUKU                        | 3391      | 6.1   | 0.57   | Canopy | 4.7    |
| * <i>Syringa reticulata</i> var. <i>amurensis</i> |                                                 | SYRRET                        | 3926      | 3.6   | 0.36   | Shrub  | 4.1    |
| * <i>Ulmus laciniata</i>                          |                                                 | ULMLAC                        | 1361      | 11.1  | .98    | Canopy | 3.3    |
| * <i>Fraxinus mandshurica</i>                     |                                                 | FRAMAN                        | 961       | 14.4  | 1.01   | Canopy | 2.8    |
| <i>Acer mandshuricum</i>                          |                                                 | ACEMAN                        | 1553      | 6.9   | 0.59   | Canopy | 2.5    |
| * <i>Populus davidiana</i>                        |                                                 | POPDAV                        | 1172      | 11.8  | 1.01   | Canopy | 2.4    |
| <i>Actinidia kolomikta</i>                        |                                                 | ACTKOL                        | 2170      | 1.8   | 0.03   | Liana  | 2.3    |
| <i>Cerasus maximowiczii</i>                       |                                                 | CERMAX                        | 1501      | 5.6   | 0.27   | Canopy | 2.2    |
| <i>Acanthopanax senticosus</i>                    |                                                 | ACASEN                        | 1932      | 1.3   | 0.01   | Shrub  | 2.1    |
| <i>Philadelphus schrenkii</i>                     |                                                 | PHISCH                        | 1317      | 1.5   | 0.01   | Shrub  | 1.8    |
| <i>Lonicera ruprechtiana</i>                      |                                                 | LONRUP                        | 1021      | 1.5   | 0.01   | Shrub  | 1.7    |
| <i>Aralia elata</i>                               |                                                 | ARAELA                        | 1506      | 2.9   | .05    | Shrub  | 1.5    |
| * <i>Taxus cuspidata</i>                          | TAXCUS                                          | 172                           | 39.4      | 0.93  | Canopy | 1.5    |        |
| CB                                                | * <i>Tilia amurensis</i>                        | TILAMU                        | 2927      | 31.3  | 12.31  | Canopy | 14.8   |
|                                                   | * <i>Pinus koraiensis</i>                       | PINKOR                        | 2468      | 32.6  | 9.79   | Canopy | 12.4   |
|                                                   | * <i>Acer mono</i>                              | ACEMON                        | 6609      | 7.5   | 2.69   | Canopy | 10.6   |
|                                                   | * <i>Corylus mandshurica</i>                    | CORMAN                        | 7834      | 1.7   | 0.08   | Shrub  | 9.6    |
|                                                   | * <i>Acer pseudosieboldianum</i>                | ACEPSE                        | 5984      | 6.1   | 1.1    | Canopy | 8.6    |
|                                                   | * <i>Quercus mongolica</i>                      | QUEMON                        | 926       | 41.3  | 6.5    | Canopy | 8.0    |
|                                                   | * <i>Fraxinus mandshurica</i>                   | FRAMAN                        | 681       | 47.9  | 5.81   | Canopy | 6.7    |
|                                                   | * <i>Acer barbinerve</i>                        | ACEBAR                        | 3911      | 2.3   | 0.08   | Shrub  | 5.9    |
|                                                   | * <i>Ulmus japonica</i>                         | ULMJAP                        | 1109      | 14.1  | 1.81   | Canopy | 4.3    |
|                                                   | <i>Syringa reticulata</i> var. <i>amurensis</i> | SYRRET                        | 1598      | 3.8   | 0.09   | Shrub  | 3.0    |
|                                                   | DL                                              | * <i>Quercus wutaishanica</i> | QUEWUT    | 5274  | 18.9   | 7.36   | Canopy |
| * <i>Acer mono</i>                                |                                                 | ACEMON                        | 10539     | 5.7   | 1.32   | Canopy | 12.1   |
| * <i>Betula dahurica</i>                          |                                                 | BETDAH                        | 2536      | 17.5  | 3.03   | Canopy | 9.6    |
| * <i>Syringa pubescens</i>                        |                                                 | SYRPUB                        | 6313      | 3     | 0.22   | Shrub  | 6.9    |
| * <i>Abelia biflora</i>                           |                                                 | ABEBIF                        | 5174      | 2.4   | 0.23   | Shrub  | 6.0    |
| * <i>Corylus mandshurica</i>                      |                                                 | CORMAN                        | 6192      | 12.6  | 0.14   | Shrub  | 5.8    |
| * <i>Rhododendron micranthum</i>                  |                                                 | RHOMIC                        | 71301     | 2.9   | 0.04   | Shrub  | 1.8    |
| <i>Populus davidiana</i>                          |                                                 | POPDAV                        | 1967      | 18.8  | 1.22   | Canopy | 5.0    |
| <i>Betula platyphylla</i>                         |                                                 | BETPLA                        | 776       | 5.5   | 1.07   | Canopy | 3.8    |
| * <i>Fraxinus rhynchophylla</i>                   |                                                 | FRARHY                        | 2385      | 19.5  | 0.28   | Canopy | 3.8    |
| <i>Juglans mandshurica</i>                        |                                                 | JUGMAN                        | 576       | 8.7   | 0.86   | Canopy | 2.9    |
| TT                                                | * <i>Eurya loquatiana</i>                       | EURLOQ                        | 20414     | 2.6   | 16.46  | Shrub  | 12.1   |
|                                                   | * <i>Litsea elongata</i>                        | LITELO                        | 10395     | 4.8   | 34.95  | Canopy | 8.2    |
|                                                   | <i>Choerospondias axillaris</i>                 | CHOERO                        | 1352      | 20.8  | 76.04  | Canopy | 6.5    |
|                                                   | * <i>Distylium myricoides</i>                   | DISMYR                        | 6298      | 6.3   | 40.11  | Shrub  | 6.4    |
|                                                   | * <i>Lithocarpus henryi</i>                     | LITHEN                        | 2688      | 12.2  | 53.91  | Canopy | 5.5    |
|                                                   | * <i>Cyclobalanopsis nubium</i>                 | CYCNUB                        | 2484      | 12.4  | 55.11  | Canopy | 5.5    |
|                                                   | * <i>Camellia fraterna</i>                      | CAMFRA                        | 9279      | 2.4   | 6.45   | Shrub  | 5.4    |
|                                                   | <i>Schima superba</i>                           | SCHSUP                        | 1237      | 17.3  | 40.67  | Canopy | 3.8    |

Continued on next page



| Plot | Species                                             | Abbreviation | Abundance | DBH  | BA    | Groups | IV (%) |
|------|-----------------------------------------------------|--------------|-----------|------|-------|--------|--------|
|      | <i>Castanopsis fargesii</i>                         | CASFRA       | 750       | 22.7 | 42.81 | Canopy | 3.7    |
|      | <i>Machilus thunbergii</i>                          | MACTHU       | 2807      | 5.8  | 18.81 | Canopy | 2.9    |
| BDG  | * <i>Cyclobalanopsis multinervis</i>                | CYCMUL       | 11503     | 7    | 5.36  | Canopy | 8.1    |
|      | * <i>Fagus lucida</i>                               | FAGLUC       | 2769      | 13.1 | 3.84  | Canopy | 4.3    |
|      | <i>Cyclobalanopsis gracilis</i>                     | CYCGRA       | 5322      | 6.2  | 2.53  | Canopy | 3.8    |
|      | <i>Carpinus fargesii</i>                            | CARFAR       | 2172      | 11.1 | 1.97  | Canopy | 2.4    |
|      | <i>Schima parviflora</i>                            | SCHPAR       | 1796      | 9.5  | 1.86  | Canopy | 2.2    |
|      | <i>Sassafras tzumu</i>                              | SASTZU       | 453       | 30.6 | 2.19  | Canopy | 2.2    |
|      | <i>Castanea seguinii</i>                            | CASSEG       | 471       | 28.6 | 1.9   | Canopy | 1.9    |
|      | <i>Betula insignis</i>                              | BETINS       | 434       | 27.7 | 1.64  | Canopy | 1.7    |
|      | <i>Quercus serrata</i>                              | QUESER       | 703       | 20.7 | 1.53  | Canopy | 1.6    |
|      | * <i>Eurya brevistyla</i>                           | EURBRE       | 16051     | 3    | 0.81  | Shrub  | 5.1    |
|      | <i>Nyssa sinensis</i>                               | NYSSIN       | 805       | 17.9 | 1.4   | Canopy | 1.5    |
|      | * <i>Rhododendron stamineum</i>                     | RHOSTA       | 9549      | 9.1  | 4.36  | Canopy | 6.6    |
|      | * <i>Litsea elongata</i>                            | LITELO       | 21035     | 2.6  | 0.96  | Canopy | 6.5    |
| GT   | * <i>Castanopsis eyrei</i>                          | CASEYR       | 12406     | 11.9 | 12.52 | Canopy | 15.3   |
|      | * <i>Schima superba</i>                             | SCHSUP       | 8514      | 10.4 | 6.89  | Canopy | 9.4    |
|      | * <i>Pinus massoniana</i>                           | PINMAS       | 2061      | 18.7 | 4.23  | Canopy | 4.3    |
|      | * <i>Cyclobalanopsis glauca</i>                     | CYCGLA       | 1620      | 10.4 | 0.88  | Canopy | 1.8    |
|      | <i>Daphniphyllum oldhami</i>                        | DAPOLD       | 2718      | 6.9  | 0.79  | Shrub  | 2.1    |
|      | <i>Machilus thunbergii</i>                          | MACTHU       | 1384      | 8.6  | 0.76  | Canopy | 1.6    |
|      | <i>Cyclobalanopsis myrsinaefolia</i>                | CYCMYR       | 375       | 17   | 0.59  | Canopy | 0.9    |
|      | * <i>Quercus serrata</i> var. <i>brevipetiolata</i> | QUESER       | 3508      | 10.6 | 1.63  | Canopy | 2.8    |
|      | * <i>Rhododendron ovatum</i>                        | RHOOVA       | 10793     | 3.9  | 0.72  | Shrub  | 4.2    |
|      | <i>Loropetalum chinense</i>                         | LORCHI       | 4461      | 5    | 0.64  | Shrub  | 2.4    |
| YLXS | * <i>Berberis fallax</i>                            | BERFAL       | 28416     | 1.4  | 0.2   | Shrub  | 68.1   |
|      | * <i>Abies forrestii</i>                            | ABIFOR       | 5207      | 19.6 | 15.18 | Canopy | 51.2   |
|      | <i>Quercus guajavifolia</i>                         | QUEGUA       | 1324      | 45.1 | 12.92 | Canopy | 36.1   |
|      | <i>Picea likiangensis</i>                           | PICLIK       | 596       | 50.8 | 9.03  | Canopy | 25.5   |
|      | <i>Gamblea ciliata</i> var. <i>evodiifolia</i>      | GAMCIL       | 1065      | 25.7 | 2.67  | Canopy | 14.0   |
|      | <i>Acer pectinatum</i>                              | ACEPEC       | 958       | 23.3 | 2.01  | Canopy | 11.7   |
|      | <i>Sorbus prattii</i>                               | SORPRA       | 915       | 11.8 | 0.49  | Shrub  | 8.8    |
|      | <i>Viburnum betulifolium</i>                        | VIBBET       | 1114      | 3.8  | 0.06  | Shrub  | 8.3    |
|      | <i>Rhododendron yunnanense</i>                      | RHOYUN       | 1162      | 11   | 0.67  | Shrub  | 7.4    |
|      | <i>Padus brachypoda</i>                             | PADBRA       | 328       | 28.5 | 1.04  | Canopy | 5.6    |
| ML   | * <i>Cryptocarya microcarps</i>                     | CRYMIC       | 31939     | 4.2  | 2.97  | Canopy | 15.5   |
|      | * <i>Itoa orientalis</i>                            | ITOORI       | 3050      | 9.9  | 1.35  | Canopy | 4.4    |
|      | * <i>Lindera communis</i>                           | LINCOM       | 4192      | 4.1  | 0.33  | Shrub  | 3.4    |
|      | <i>Eurycorymbus cavaleriei</i>                      | EURCAV       | 1525      | 10.6 | 0.76  | Canopy | 2.9    |
|      | * <i>Platycarya longipes</i>                        | PLALON       | 3520      | 6.6  | 0.85  | Canopy | 2.2    |
|      | <i>Brassaiaopsis glomerulata</i>                    | BRAGLO       | 2910      | 4.3  | 0.27  | Canopy | 2.1    |
|      | <i>Radermachera sinica</i>                          | RADSIN       | 965       | 9.8  | 0.43  | Canopy | 1.9    |
|      | <i>Boniodendron minus</i>                           | BONMIN       | 1521      | 6.2  | 0.35  | Shrub  | 1.8    |
|      | <i>Diospyros dumetorum</i>                          | DIODUM       | 2590      | 3.4  | 0.14  | Canopy | 1.8    |
|      | <i>Rubrovietnamia aristata</i>                      | RUBARI       | 1614      | 4.7  | 0.16  | Shrub  | 1.7    |
| DH   | * <i>Castanopsis chinensis</i>                      | CASCHI       | 2311      | 24.4 | 9.3   | Canopy | 12.3   |
|      | * <i>Schima superba</i>                             | SCHSUP       | 2296      | 18.9 | 4.13  | Canopy | 6.6    |
|      | * <i>Engelhardtia roxburghiana</i>                  | ENGROX       | 737       | 28.8 | 3.48  | Canopy | 4.8    |
|      | * <i>Machilus chinensis</i>                         | MACCHI       | 532       | 16.3 | 0.85  | Canopy | 1.7    |
|      | * <i>Syzygium rehderianum</i>                       | SYZREH       | 5990      | 4.7  | 0.88  | Shrub  | 4.7    |
|      | * <i>Grarbiendendron scleranthum</i>                | GRASCL       | 3325      | 8.6  | 1.66  | Canopy | 4.4    |
|      | * <i>Aidia canthioides</i>                          | AIDCAN       | 5996      | 2.3  | 0.21  | Shrub  | 4.1    |
|      | * <i>Cryptocarya chinensis</i>                      | CRYCHI       | 2557      | 6.5  | 1.21  | Canopy | 3.5    |
|      | <i>Cryptocarya concinna</i>                         | CRYCON       | 4478      | 1.8  | 0.18  | Canopy | 3.3    |
|      | * <i>Aporosa yunnanensis</i>                        | APOYUN       | 3747      | 4.7  | 0.44  | Shrub  | 3.0    |
|      | <i>Ardisia quinquegona</i>                          | ARDQUI       | 3702      | 1.9  | 0.08  | Shrub  | 2.8    |
|      | <i>Blastus cochinchinensis</i>                      | BLACOC       | 4011      | 1.6  | 0.06  | Shrub  | 2.7    |
|      | * <i>Acmena acuminatissima</i>                      | ACEACU       | 1484      | 8.7  | 1.1   | Canopy | 2.6    |
| NG   | * <i>Cleistanthus sumatranus</i>                    | CLESUM       | 9977      | 4.8  | 2     | Canopy | 9.1    |
|      | * <i>Sterculia monosperma</i>                       | STEMON       | 6328      | 5.7  | 1.59  | Canopy | 7.5    |
|      | * <i>Vitex kwangsiensis</i>                         | VITKWA       | 2470      | 11.4 | 1.44  | Canopy | 6.9    |
|      | <i>Eccentroedendron tonkinense</i>                  | EXCTON       | 1502      | 6.5  | 0.77  | Canopy | 2.8    |
|      | <i>Diplodiscus trichosperma</i>                     | DIPTRI       | 1126      | 8.1  | 0.49  | Canopy | 2.4    |
|      | <i>Erythrina stricta</i>                            | ERYSTR       | 316       | 23.7 | 1.14  | Canopy | 2.3    |
|      | <i>Hydnocarpus hainanensis</i>                      | HYDHAI       | 2260      | 3.3  | 0.21  | Canopy | 2.3    |
|      | <i>Antidesma japonicum</i>                          | ANTJAP       | 2535      | 3    | 0.18  | Shrub  | 2.2    |

Continued on next page

| Plot | Species                         | Abbreviation | Abundance | DBH  | BA   | Groups | IV (%) |
|------|---------------------------------|--------------|-----------|------|------|--------|--------|
|      | <i>Ficus hispida</i>            | FICHIS       | 2989      | 3.2  | 0.28 | Shrub  | 2.1    |
|      | <i>Garcinia paucinervis</i>     | GARPAU       | 1684      | 3.4  | 0.25 | Canopy | 2.1    |
| XSBN | * <i>Pittosporopsis kerrii</i>  | PITKER       | 20918     | 3.2  | 1.42 | Shrub  | 25.8   |
|      | * <i>Parashorea chinensis</i>   | PARCHI       | 7919      | 5.2  | 5.68 | Canopy | 22.4   |
|      | <i>Castanopsis echidnocarpa</i> | CASECH       | 1679      | 12.8 | 2.47 | Canopy | 7.1    |
|      | <i>Garcinia cowa</i>            | GARCOW       | 4333      | 5.1  | 0.96 | Canopy | 7.3    |
|      | <i>Mezzettiopsis creaghii</i>   | MEZCRE       | 3300      | 6.2  | 1.26 | Canopy | 6.9    |
|      | <i>Baccaurea ramiflora</i>      | BACRAM       | 3212      | 5.2  | 0.7  | Canopy | 5.5    |
|      | <i>Knema furfuracea</i>         | KNEFUR       | 3160      | 4    | 0.56 | Canopy | 5.1    |
|      | <i>Saprosma ternata</i>         | SAPTER       | 2698      | 1.9  | 0.05 | Shrub  | 4.7    |
|      | <i>Phoebe lanceolata</i>        | PHOLAN       | 2409      | 3.6  | 0.22 | Canopy | 3.5    |
|      | <i>Cinnamomum bejolghota</i>    | CINBEJ       | 1337      | 5.4  | 0.44 | Canopy | 3.9    |

Table 3: A winnowed list of candidate foundation tree and shrub species (the latter indicated by a plus sign [+]) at three different spatial grains (i.e., subplot size) in 12 Chinese forest dynamics plots. Plots are ordered by latitude, and within each plot, candidate foundation species are ordered alphabetically. The two *Acer* species in **bold type** satisfied all aspects of both the outlier and the diversity criteria for candidate foundation species at the given spatial grain. The starred (\*) species satisfied the outlier criterion (Fig. 1) and partially satisfied the diversity criterion at the given spatial grain: a positive spatial relationship between candidate foundation species size and beta diversity, and a negative spatial relationship between candidate foundation species size and at least one measure of alpha diversity. The remaining species did not satisfy the outlier criterion but did meet some aspects of the diversity criterion. No species met either foundation species criterion in the BDGS, TTS and YLXS plots at any spatial grain.

| Plot | Spatial grain                                                                                                                                                                                                            |                                                                                                                                                    |                                                                                       |
|------|--------------------------------------------------------------------------------------------------------------------------------------------------------------------------------------------------------------------------|----------------------------------------------------------------------------------------------------------------------------------------------------|---------------------------------------------------------------------------------------|
|      | 5 m                                                                                                                                                                                                                      | 10 m                                                                                                                                               | 20 m                                                                                  |
| LS   | * <i>Acer ukurunduense</i><br>* <i>Corylus mandshurica</i> <sup>+</sup><br>* <i>Fraxinus mandshurica</i>                                                                                                                 | * <i>Acer ukurunduense</i><br>—<br>—                                                                                                               | —<br>—<br>—                                                                           |
| MLG  | * <b><i>Acer barbinerve</i></b> <sup>+</sup><br>* <i>Acer tegmentosum</i><br>* <b><i>Acer ukurunduense</i></b><br>* <i>Corylus mandshurica</i> <sup>+</sup><br>—<br>* <i>Taxus cuspidata</i><br>* <i>Tilia amurensis</i> | * <i>Acer barbinerve</i> <sup>+</sup><br>—<br>—<br>—<br>* <i>Pinus koraiensis</i><br>—<br>* <i>Tilia amurensis</i>                                 | —<br>—<br>—<br>—<br>* <i>Pinus koraiensis</i><br>—<br>* <i>Tilia amurensis</i>        |
| CB   | * <i>Acer barbinerve</i> <sup>+</sup><br>* <i>Acer pseudosieboldianum</i><br>* <i>Corylus mandshurica</i> <sup>+</sup><br><i>Syringa reticulata</i> var. <i>amurensis</i> <sup>+</sup>                                   | —<br>* <i>Acer pseudosieboldianum</i><br>* <i>Corylus mandshurica</i> <sup>+</sup><br><i>Syringa reticulata</i> var. <i>amurensis</i> <sup>+</sup> | —<br>—<br>—<br>—                                                                      |
| DL   | <i>Juglans mandshurica</i>                                                                                                                                                                                               | —                                                                                                                                                  | —                                                                                     |
| TT   | —                                                                                                                                                                                                                        | —                                                                                                                                                  | —                                                                                     |
| BDG  | —                                                                                                                                                                                                                        | —                                                                                                                                                  | —                                                                                     |
| GT   | <i>Machilus thunbergii</i><br>—<br>—                                                                                                                                                                                     | —<br>—<br>—                                                                                                                                        | —<br>* <i>Pinus massoniana</i><br>* <i>Quercus serrata</i> var. <i>brevipetiolata</i> |
| YLXS | —                                                                                                                                                                                                                        | —                                                                                                                                                  | —                                                                                     |
| ML   | <i>Brassaiopsis glomerulata</i>                                                                                                                                                                                          | <i>Brassaiopsis glomerulata</i>                                                                                                                    | —                                                                                     |
| DH   | * <i>Aporusa yunnanensis</i> <sup>+</sup>                                                                                                                                                                                | * <i>Aporusa yunnanensis</i> <sup>+</sup>                                                                                                          | * <i>Aporusa yunnanensis</i> <sup>+</sup>                                             |
| NG   | <i>Ficus hispida</i> <sup>+</sup>                                                                                                                                                                                        | <i>Ficus hispida</i> <sup>+</sup>                                                                                                                  | —                                                                                     |
| XSBN | <i>Mezzettiopsis creaghii</i>                                                                                                                                                                                            | <i>Mezzettiopsis creaghii</i>                                                                                                                      | <i>Mezzettiopsis creaghii</i>                                                         |

Table 4: Codispersion statistics for the candidate foundation tree or understory species (the latter indicated by a [+]) in each plot at the spatial grain (**Grain**) at which they were identified (species listed in Table 3). As in Table 3, the two *Acer* species in **bold type** satisfied all aspects of both the outlier and the diversity criteria for candidate foundation species at the given spatial grain. The starred (\*) species satisfied the outlier criterion (Fig. 1) and partially satisfied the diversity criterion at the given spatial grain: a positive spatial relationship between candidate foundation species size and beta diversity, and a negative spatial relationship between candidate foundation species size and at least one measure of alpha diversity. The remaining species did not satisfy the outlier criterion but did meet some aspects of the diversity criterion. No species met either foundation species criterion in the BDGS, TTS and YLXS plots at any spatial grain. Plots are ordered by latitude, and within each plot, species are grouped alphabetically within increasing grain (subplot) sizes. Values are the minimum (**Min**), median (**Median**), mean (**Mean**), one standard deviation of the mean (**SD**), and maximum (**Max**), computed over all spatial lags, of the codispersion between the basal area of the candidate foundation species and all other woody species in square subplots with the length of a side = the spatial grain.

| Plot | Grain                   | Species                                  | Diversity metric | Min          | Median       | Mean (SD)    | Max   |
|------|-------------------------|------------------------------------------|------------------|--------------|--------------|--------------|-------|
| LS   | 5 m                     | <i>*Acer ukurunduense</i>                | Bray-Curtis      | 0.03         | 0.12         | 0.12 (0.02)  | 0.16  |
|      |                         |                                          | Richness         | -0.13        | -0.09        | -0.09 (0.02) | -0.01 |
|      |                         |                                          | Shannon          | -0.12        | -0.08        | -0.08 (0.02) | -0.01 |
|      |                         |                                          | Simpson          | -0.07        | -0.04        | -0.04 (0.01) | 0.01  |
|      |                         | <i>*Corylus mandshurica</i> <sup>+</sup> | Abundance        | -0.14        | -0.1         | -0.10 (0.02) | -0.03 |
|      |                         |                                          | Bray-Curtis      | 0.01         | 0.06         | 0.06 (0.02)  | 0.11  |
|      |                         |                                          | Richness         | -0.15        | -0.1         | -0.10 (0.02) | -0.06 |
|      |                         |                                          | Shannon          | -0.14        | -0.09        | -0.09 (0.02) | -0.05 |
|      |                         | <i>*Fraxinus mandshurica</i>             | Simpson          | -0.09        | -0.05        | -0.05(0.02)  | 0     |
|      |                         |                                          | Abundance        | -0.16        | -0.11        | -0.11 (0.02) | -0.07 |
|      |                         |                                          | Bray-Curtis      | 0            | 0.05         | 0.05 (0.02)  | 0.09  |
|      |                         |                                          | Richness         | -0.09        | -0.05        | -0.05 (0.01) | -0.01 |
|      | 10 m                    | <i>*Acer ukurunduense</i>                | Shannon          | -0.09        | -0.05        | -0.05 (0.01) | -0.01 |
|      |                         |                                          | Simpson          | -0.09        | -0.05        | -0.05 (0.02) | 0     |
|      |                         |                                          | Abundance        | -0.09        | -0.03        | -0.03 (0.01) | 0.01  |
|      |                         |                                          | Bray-Curtis      | 0.15         | 0.21         | 0.21 (0.03)  | 0.27  |
|      |                         |                                          | Richness         | -0.23        | -0.17        | -0.17 (0.03) | -0.09 |
|      |                         |                                          | Shannon          | -0.19        | -0.12        | -0.12 (0.03) | -0.04 |
|      |                         |                                          | Simpson          | -0.10        | -0.05        | -0.05 (0.02) | 0.01  |
|      |                         |                                          | Abundance        | -0.27        | -0.21        | -0.21 (0.03) | -0.14 |
| MLG  | 5 m                     | <i>*Acer barbinerve</i> <sup>+</sup>     | Bray-Curtis      | 0.12         | 0.16         | 0.16 (0.01)  | 0.20  |
|      |                         |                                          | Richness         | -0.22        | -0.16        | -0.16 (0.02) | -0.10 |
|      |                         |                                          | Shannon          | -0.16        | -0.13        | -0.13 (0.01) | -0.08 |
|      |                         |                                          | Simpson          | -0.10        | -0.07        | -0.07 (0.01) | -0.04 |
|      |                         | <i>*Acer tegmentosum</i>                 | Abundance        | -0.24        | -0.16        | -0.15 (0.03) | -0.09 |
|      |                         |                                          | Bray-Curtis      | 0.02         | 0.05         | 0.05 (0.01)  | 0.09  |
|      |                         |                                          | Richness         | -0.11        | -0.07        | -0.07 (0.01) | -0.04 |
|      |                         |                                          | Shannon          | -0.08        | -0.04        | -0.04 (0.01) | -0.01 |
|      |                         | <i>*Acer ukurunduense</i>                | Simpson          | -0.06        | -0.02        | -0.02 (0.01) | 0.01  |
|      |                         |                                          | Abundance        | -0.15        | -0.11        | -0.11 (0.01) | -0.07 |
|      |                         |                                          | Bray-Curtis      | 0.03         | 0.06         | 0.06 (0.01)  | 0.09  |
|      |                         |                                          | Richness         | -0.11        | -0.07        | -0.07 (0.01) | -0.04 |
|      |                         | <i>Corylus mandshurica</i> <sup>+</sup>  | Shannon          | -0.09        | -0.05        | -0.06 (0.01) | -0.01 |
|      |                         |                                          | Simpson          | -0.08        | -0.05        | -0.05 (0.01) | -0.01 |
|      |                         |                                          | Abundance        | -0.11        | -0.08        | -0.08 (0.02) | -0.03 |
|      |                         |                                          | Bray-Curtis      | 0.12         | 0.16         | 0.16 (0.01)  | 0.20  |
|      | <i>*Taxus cuspidata</i> | Richness                                 | -0.14            | -0.10        | -0.10 (0.01) | -0.07        |       |
|      |                         | Shannon                                  | -0.11            | -0.08        | -0.08 (0.01) | -0.04        |       |
|      |                         | Simpson                                  | -0.04            | -0.01        | -0.01 (0.01) | 0.02         |       |
|      |                         | Abundance                                | -0.20            | -0.10        | -0.11 (0.02) | -0.06        |       |
|      | <i>*Tilia amurensis</i> | Bray-Curtis                              | 0.05             | 0.09         | 0.09 (0.01)  | 0.12         |       |
|      |                         | Richness                                 | -0.12            | -0.08        | -0.08 (0.02) | -0.03        |       |
|      |                         | Shannon                                  | -0.09            | -0.05        | -0.05 (0.01) | -0.02        |       |
|      |                         | Simpson                                  | -0.06            | -0.03        | -0.03 (0.01) | 0            |       |
|      | 10 m                    | <i>*Acer barbinerve</i> <sup>+</sup>     | Abundance        | -0.13        | -0.07        | -0.07 (0.02) | -0.04 |
|      |                         |                                          | Bray-Curtis      | 0.02         | 0.05         | 0.05 (0.01)  | 0.08  |
|      |                         |                                          | Richness         | -0.11        | -0.06        | -0.06 (0.02) | -0.01 |
|      |                         |                                          | Shannon          | -0.07        | -0.04        | -0.04 (0.01) | 0     |
|      |                         |                                          | Simpson          | -0.05        | -0.02        | -0.02 (0.01) | 0.01  |
|      |                         |                                          | Abundance        | -0.15        | -0.09        | -0.09 (0.02) | -0.03 |
|      |                         |                                          | Bray-Curtis      | 0.07         | 0.12         | 0.12 (0.02)  | 0.17  |
|      |                         |                                          | Richness         | -0.22        | -0.11        | -0.11 (0.04) | 0.03  |
|      | Shannon                 | -0.14                                    | -0.09            | -0.09 (0.02) | -0.02        |              |       |

Continued on next page

| Plot | Grain | Species                                                      | Diversity metric | Min   | Median | Mean (SD)    | Max   |
|------|-------|--------------------------------------------------------------|------------------|-------|--------|--------------|-------|
|      |       |                                                              | Simpson          | -0.14 | -0.09  | -0.09 (0.02) | -0.03 |
|      |       |                                                              | Abundance        | -0.26 | -0.07  | -0.07 (0.06) | 0.04  |
|      |       | * <i>Pinus koraiensis</i>                                    | Bray-Curtis      | -0.02 | 0.13   | 0.13 (0.05)  | 0.22  |
|      |       |                                                              | Richness         | -0.18 | -0.10  | -0.10 (0.04) | -0.03 |
|      |       |                                                              | Shannon          | -0.06 | -0.01  | 0 (0.02)     | 0.05  |
|      |       |                                                              | Simpson          | -0.02 | 0.05   | 0.05 (0.03)  | 0.13  |
|      |       | * <i>Tilia amurensis</i>                                     | Abundance        | -0.25 | -0.15  | -0.16 (0.05) | -0.06 |
|      |       |                                                              | Bray-Curtis      | 0.02  | 0.15   | 0.16 (0.05)  | 0.27  |
|      |       |                                                              | Richness         | -0.30 | -0.18  | -0.19 (0.05) | -0.08 |
|      |       |                                                              | Shannon          | -0.14 | -0.08  | -0.08 (0.02) | -0.02 |
|      |       |                                                              | Simpson          | -0.05 | -0.01  | 0 (0.02)     | 0.04  |
|      | 20 m  | * <i>Pinus koraiensis</i>                                    | Abundance        | -0.32 | -0.18  | -0.2 (0.06)  | -0.09 |
|      |       |                                                              | Bray-Curtis      | 0.11  | 0.32   | 0.31 (0.09)  | 0.45  |
|      |       |                                                              | Richness         | -0.3  | -0.18  | -0.18 (0.09) | 0     |
|      |       |                                                              | Shannon          | -0.03 | 0.05   | 0.05 (0.05)  | 0.16  |
|      |       |                                                              | Simpson          | 0.01  | 0.15   | 0.14 (0.07)  | 0.26  |
|      |       | * <i>Tilia amurensis</i>                                     | Abundance        | -0.35 | -0.22  | -0.23 (0.08) | -0.06 |
|      |       |                                                              | Bray-Curtis      | 0.10  | 0.35   | 0.37 (0.1)   | 0.53  |
|      |       |                                                              | Richness         | -0.56 | -0.39  | -0.4 (0.1)   | -0.19 |
|      |       |                                                              | Shannon          | -0.25 | -0.17  | -0.16 (0.05) | -0.04 |
|      |       |                                                              | Simpson          | -0.15 | -0.07  | -0.06 (0.05) | 0.07  |
|      |       |                                                              | Abundance        | -0.49 | -0.30  | -0.33 (0.1)  | -0.16 |
| CB   | 5 m   | * <i>Acer barbinerve</i> <sup>+</sup>                        | Bray-Curtis      | 0.03  | 0.07   | 0.07 (0.01)  | 0.10  |
|      |       |                                                              | Richness         | -0.11 | -0.07  | -0.07 (0.01) | -0.04 |
|      |       |                                                              | Shannon          | -0.09 | -0.06  | -0.06 (0.01) | -0.03 |
|      |       |                                                              | Simpson          | -0.03 | 0      | 0 (0.01)     | 0.03  |
|      |       |                                                              | Abundance        | -0.11 | -0.08  | -0.08 (0.01) | -0.05 |
|      |       | * <i>Acer pseudosieboldianum</i>                             | Bray-Curtis      | 0.04  | 0.08   | 0.08 (0.01)  | 0.10  |
|      |       |                                                              | Richness         | -0.14 | -0.11  | -0.11 (0.01) | -0.06 |
|      |       |                                                              | Shannon          | -0.13 | -0.10  | -0.10 (0.01) | -0.05 |
|      |       |                                                              | Simpson          | -0.06 | -0.03  | -0.03 (0.01) | 0     |
|      |       |                                                              | Abundance        | -0.16 | -0.13  | -0.13 (0.01) | -0.07 |
|      |       | * <i>Corylus mandshurica</i> <sup>+</sup>                    | Bray-Curtis      | 0.06  | 0.10   | 0.1 (0.01)   | 0.13  |
|      |       |                                                              | Richness         | -0.17 | -0.14  | -0.14 (0.01) | -0.11 |
|      |       |                                                              | Shannon          | -0.15 | -0.12  | -0.12 (0.01) | -0.10 |
|      |       |                                                              | Simpson          | -0.03 | -0.01  | -0.01 (0.01) | 0.02  |
|      |       |                                                              | Abundance        | -0.18 | -0.14  | -0.14 (0.01) | -0.11 |
|      |       | <i>Syringa reticulata</i> var. <i>amurensis</i> <sup>+</sup> | Bray-Curtis      | 0.01  | 0.07   | 0.07(0.01)   | 0.10  |
|      |       |                                                              | Richness         | -0.07 | -0.04  | -0.04 (0.01) | -0.02 |
|      |       |                                                              | Shannon          | -0.06 | -0.03  | -0.03 (0.01) | -0.01 |
|      |       |                                                              | Simpson          | -0.02 | 0      | 0 (0.01)     | 0.03  |
|      |       |                                                              | Abundance        | -0.08 | -0.05  | -0.05 (0.01) | -0.03 |
|      | 10 m  | * <i>Acer pseudosieboldianum</i>                             | Bray-Curtis      | 0.02  | 0.08   | 0.08 (0.02)  | 0.12  |
|      |       |                                                              | Richness         | -0.24 | -0.18  | -0.18 (0.02) | -0.09 |
|      |       |                                                              | Shannon          | -0.16 | -0.12  | -0.11 (0.02) | -0.05 |
|      |       |                                                              | Simpson          | -0.1  | -0.05  | -0.05 (0.02) | 0     |
|      |       |                                                              | Abundance        | -0.28 | -0.22  | -0.22 (0.02) | -0.13 |
|      |       | * <i>Corylus mandshurica</i> <sup>+</sup>                    | Bray-Curtis      | 0.06  | 0.12   | 0.12 (0.02)  | 0.16  |
|      |       |                                                              | Richness         | -0.14 | -0.10  | -0.10 (0.02) | -0.05 |
|      |       |                                                              | Shannon          | -0.1  | -0.05  | -0.05 (0.02) | 0     |
|      |       |                                                              | Simpson          | -0.1  | -0.05  | -0.05 (0.02) | -0.01 |
|      |       |                                                              | Abundance        | -0.24 | -0.18  | -0.18 (0.02) | -0.14 |
|      |       | <i>Syringa reticulata</i> var. <i>amurensis</i> <sup>+</sup> | Bray-Curtis      | 0.07  | 0.13   | 0.13 (0.02)  | 0.20  |
|      |       |                                                              | Richness         | -0.09 | -0.03  | -0.03 (0.02) | 0.04  |
|      |       |                                                              | Shannon          | -0.06 | -0.01  | -0.01 (0.02) | 0.06  |
|      |       |                                                              | Simpson          | -0.04 | 0      | 0 (0.02)     | 0.05  |
|      |       |                                                              | Abundance        | -0.14 | -0.08  | -0.08 (0.02) | -0.03 |
| DL   | 5 m   | <i>Juglans mandshurica</i>                                   | Bray-Curtis      | 0.06  | 0.24   | 0.24 (0.04)  | 0.31  |
|      |       |                                                              | Richness         | -0.26 | -0.15  | -0.15 (0.05) | -0.04 |
|      |       |                                                              | Shannon          | -0.14 | -0.09  | -0.09 (0.02) | -0.03 |
|      |       |                                                              | Simpson          | -0.15 | -0.08  | -0.08 (0.03) | -0.09 |
|      |       |                                                              | Abundance        | -0.26 | -0.17  | -0.17 (0.04) | -0.09 |
| GT   | 5 m   | <i>Machilus thunbergii</i>                                   | Bray-Curtis      | 0     | 0.04   | 0.04 (0.01)  | 0.07  |
|      |       |                                                              | Richness         | -0.08 | -0.05  | -0.05 (0.01) | 0.01  |

Continued on next page

| Plot      | Grain                                    | Species                                     | Diversity metric                  | Min                                      | Median                                   | Mean (SD)    | Max          |             |
|-----------|------------------------------------------|---------------------------------------------|-----------------------------------|------------------------------------------|------------------------------------------|--------------|--------------|-------------|
|           | 20 m                                     | <i>*Pinus massoniana</i>                    | Shannon                           | -0.07                                    | -0.04                                    | -0.04 (0.01) | 0.01         |             |
|           |                                          |                                             | Simpson                           | -0.06                                    | -0.03                                    | -0.03 (0.01) | 0.01         |             |
|           |                                          |                                             | Abundance                         | -0.08                                    | -0.06                                    | -0.06 (0.01) | 0.01         |             |
|           |                                          |                                             | Bray-Curtis                       | 0.14                                     | 0.20                                     | 0.2 (0.04)   | 0.27         |             |
|           |                                          |                                             | Richness                          | -0.28                                    | -0.16                                    | -0.16 (0.06) | -0.05        |             |
|           |                                          |                                             | Shannon                           | -0.40                                    | -0.27                                    | -0.28 (0.06) | -0.12        |             |
|           |                                          | <i>*Quercus serrata var. brevipetiolata</i> | Simpson                           | -0.33                                    | -0.21                                    | -0.21 (0.06) | -0.06        |             |
|           |                                          |                                             | Abundance                         | 0.16                                     | 0.26                                     | 0.26 (0.04)  | 0.35         |             |
|           |                                          |                                             | Bray-Curtis                       | 0.17                                     | 0.37                                     | 0.36 (0.06)  | 0.44         |             |
|           |                                          |                                             | Richness                          | -0.18                                    | -0.11                                    | -0.11 (0.05) | 0.04         |             |
|           |                                          |                                             | Shannon                           | -0.34                                    | -0.29                                    | -0.28 (0.04) | -0.13        |             |
|           |                                          |                                             | Simpson                           | -0.31                                    | -0.25                                    | -0.24 (0.04) | -0.09        |             |
| ML        | 5 m                                      | <i>Brassaiopsis glomerulata</i>             | Abundance                         | 0.39                                     | 0.52                                     | 0.51 (0.05)  | 0.58         |             |
|           |                                          |                                             | Bray-Curtis                       | 0.03                                     | 0.11                                     | 0.10 (0.03)  | 0.17         |             |
|           |                                          |                                             | Richness                          | -0.09                                    | -0.03                                    | -0.03 (0.02) | 0.03         |             |
|           |                                          |                                             | Shannon                           | -0.07                                    | -0.02                                    | -0.02 (0.02) | 0.03         |             |
|           |                                          |                                             | Simpson                           | -0.05                                    | 0                                        | 0 (0.02)     | 0.04         |             |
|           |                                          |                                             | Abundance                         | -0.15                                    | -0.08                                    | -0.08 (0.04) | 0.02         |             |
|           | 10 m                                     | <i>Brassaiopsis glomerulata</i>             | Bray-Curtis                       | 0.03                                     | 0.16                                     | 0.15 (0.06)  | 0.26         |             |
|           |                                          |                                             | Richness                          | -0.11                                    | -0.04                                    | -0.04 (0.03) | 0.04         |             |
|           |                                          |                                             | Shannon                           | -0.05                                    | 0                                        | 0 (0.02)     | 0.05         |             |
|           |                                          |                                             | Simpson                           | 0.03                                     | 0.12                                     | 0.12 (0.04)  | 0.2          |             |
|           |                                          |                                             | Abundance                         | -0.31                                    | -0.19                                    | -0.19 (0.07) | 0            |             |
|           |                                          |                                             | DH                                | 5 m                                      | <i>*Aporusa yunnanensis</i> <sup>+</sup> | Bray-Curtis  | -0.03        | 0.12        |
| Richness  | -0.20                                    | -0.13                                       |                                   |                                          |                                          | -0.12 (0.04) | 0.01         |             |
| Shannon   | -0.19                                    | -0.11                                       |                                   |                                          |                                          | -0.11 (0.04) | 0.02         |             |
| Simpson   | -0.15                                    | -0.10                                       |                                   |                                          |                                          | -0.10 (0.03) | 0            |             |
| Abundance | -0.22                                    | -0.13                                       |                                   |                                          |                                          | -0.13 (0.04) | 0            |             |
| 10 m      | <i>*Aporusa yunnanensis</i> <sup>+</sup> | Bray-Curtis                                 |                                   |                                          |                                          | -0.03        | 0.18         | 0.17 (0.08) |
|           |                                          | Richness                                    |                                   | -0.29                                    | -0.20                                    | -0.19 (0.06) | -0.03        |             |
|           |                                          | Shannon                                     |                                   | -0.21                                    | -0.12                                    | -0.12 (0.04) | 0            |             |
|           |                                          | Simpson                                     |                                   | -0.16                                    | -0.09                                    | -0.09 (0.03) | -0.02        |             |
|           |                                          | Abundance                                   |                                   | -0.37                                    | -0.26                                    | -0.24 (0.07) | -0.03        |             |
|           |                                          | 20 m                                        |                                   | <i>*Aporusa yunnanensis</i> <sup>+</sup> | Bray-Curtis                              | 0            | 0.23         | 0.21 (0.09) |
| Richness  | -0.31                                    |                                             |                                   |                                          | -0.24                                    | -0.23 (0.05) | -0.11        |             |
| Shannon   | -0.14                                    |                                             | -0.06                             |                                          | -0.06 (0.05)                             | 0.06         |              |             |
| Simpson   | -0.12                                    |                                             | -0.05                             |                                          | -0.04 (0.04)                             | 0.05         |              |             |
| Abundance | -0.47                                    |                                             | -0.37                             |                                          | -0.34 (0.09)                             | -0.14        |              |             |
| NG        | 5 m                                      |                                             | <i>Ficus hispida</i> <sup>+</sup> |                                          | Bray-Curtis                              | 0.03         | 0.11         | 0.12 (0.04) |
|           |                                          | Richness                                    |                                   | -0.18                                    | -0.10                                    | -0.11 (0.03) | -0.02        |             |
|           |                                          | Shannon                                     |                                   | -0.16                                    | -0.10                                    | -0.10 (0.03) | -0.02        |             |
|           |                                          | Simpson                                     |                                   | -0.16                                    | -0.11                                    | -0.11 (0.03) | -0.02        |             |
|           |                                          | Abundance                                   |                                   | -0.18                                    | -0.09                                    | -0.09 (0.03) | -0.02        |             |
|           |                                          | 10 m                                        |                                   | <i>Ficus hispida</i> <sup>+</sup>        | Bray-Curtis                              | 0.08         | 0.16         | 0.17 (0.06) |
|           | Richness                                 |                                             | -0.23                             |                                          | -0.15                                    | -0.15 (0.04) | -0.06        |             |
|           | Shannon                                  |                                             | -0.15                             |                                          | -0.10                                    | -0.10 (0.02) | -0.04        |             |
|           | Simpson                                  |                                             | -0.1                              |                                          | -0.07                                    | -0.07 (0.01) | -0.04        |             |
|           | Abundance                                |                                             | -0.28                             |                                          | -0.15                                    | -0.16 (0.05) | -0.06        |             |
|           | XSBN                                     |                                             | 5 m                               |                                          | <i>Mezzettiopsis creaghii</i>            | Bray-Curtis  | -0.02        | 0.09        |
|           |                                          | Richness                                    |                                   | -0.06                                    |                                          | -0.03        | -0.03 (0.01) | 0.02        |
| Shannon   |                                          | -0.05                                       |                                   | -0.01                                    |                                          | -0.01 (0.01) | 0.02         |             |
| Simpson   |                                          | -0.03                                       |                                   | -0.01                                    |                                          | 0 (0.01)     | 0.04         |             |
| Abundance |                                          | -0.09                                       |                                   | -0.06                                    |                                          | -0.06 (0.02) | 0.01         |             |
| 10 m      |                                          | <i>Mezzettiopsis creaghii</i>               |                                   | Bray-Curtis                              |                                          | 0            | 0.20         | 0.19 (0.05) |
|           |                                          |                                             | Richness                          | -0.11                                    | -0.05                                    | -0.05 (0.03) | 0.03         |             |
|           |                                          |                                             | Shannon                           | -0.06                                    | 0.05                                     | 0.04 (0.04)  | 0.14         |             |
|           |                                          |                                             | Simpson                           | -0.01                                    | 0.09                                     | 0.09 (0.04)  | 0.21         |             |
|           |                                          |                                             | Abundance                         | -0.21                                    | -0.15                                    | -0.14 (0.04) | 0.02         |             |
|           |                                          |                                             | 20 m                              | <i>Mezzettiopsis creaghii</i>            | Bray-Curtis                              | 0.16         | 0.33         | 0.31 (0.06) |
| Richness  |                                          | -0.19                                       |                                   |                                          | -0.09                                    | -0.09 (0.05) | -0.01        |             |
| Shannon   | -0.06                                    | 0.22                                        |                                   |                                          | 0.19 (0.09)                              | 0.32         |              |             |
| Simpson   | -0.03                                    | 0.23                                        |                                   |                                          | 0.21 (0.09)                              | 0.33         |              |             |
| Abundance | -0.35                                    | -0.28                                       |                                   |                                          | -0.26 (0.06)                             | -0.1         |              |             |

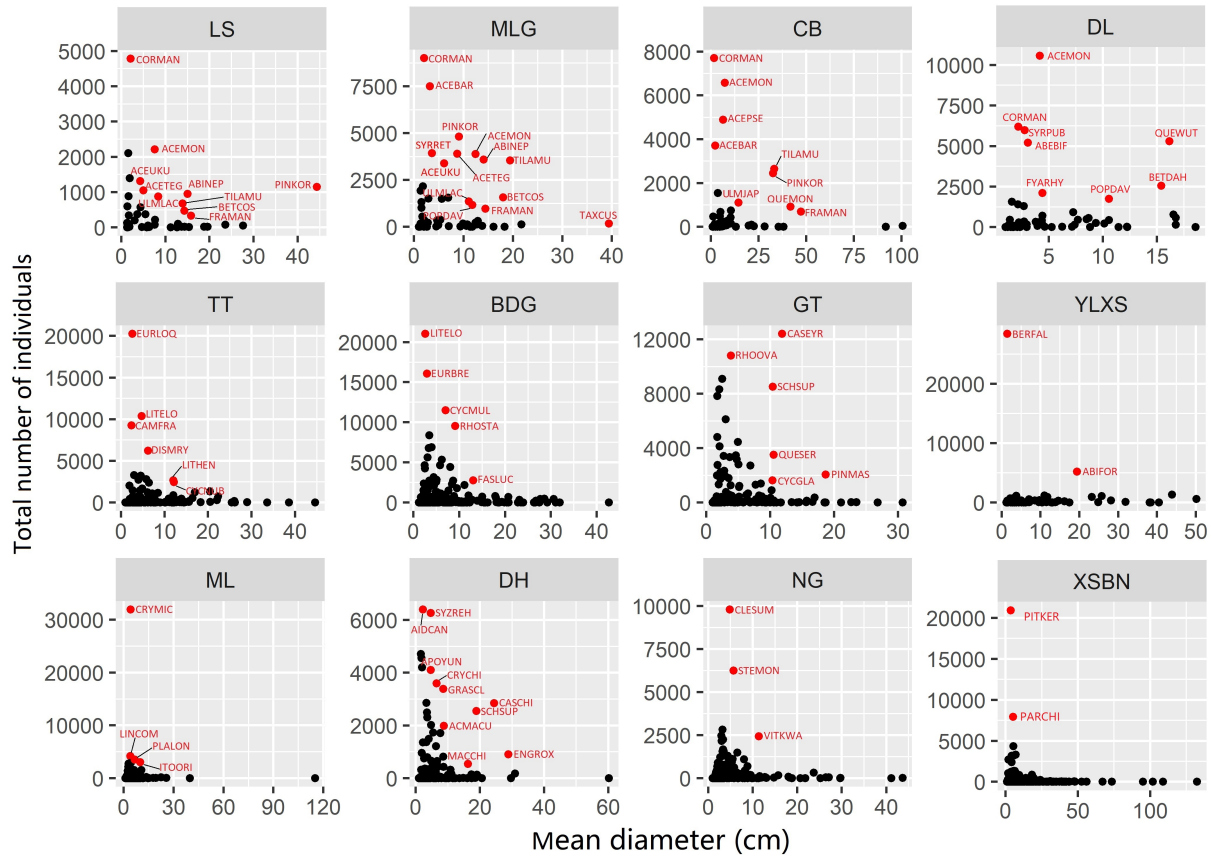

Figure 1: Size (DBH)-frequency distributions of the species in each plot. Species falling outside of the “reverse-J” line (in red) were treated in the first set of candidate foundation species. Plots are ordered left-to-right and top-to-bottom by latitude; species abbreviations are given in Table 2.

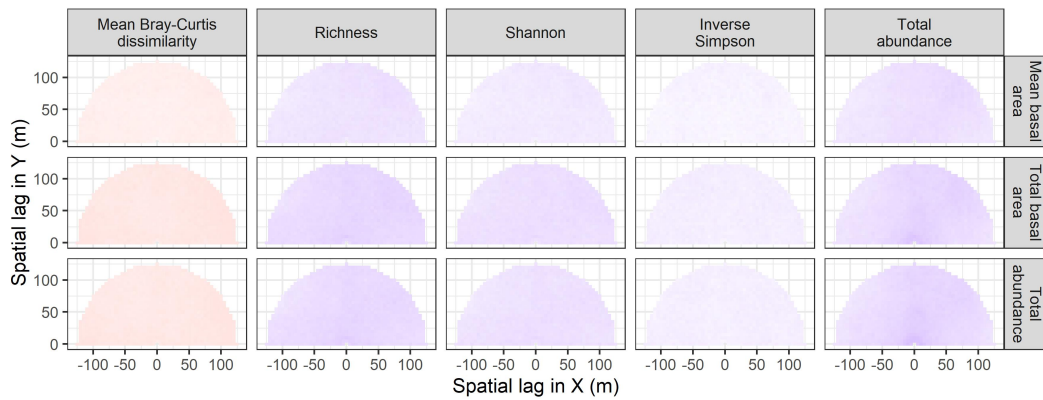

Figure 2: Codispersion between mean basal area, total basal area, or total abundance of *Acer barbinerve* and five different measures of diversity of associated woody species in 5-m subplots in the 25-ha Muling (MLG) plot. Codispersion coefficients were calculated for spatial lags ranging from 0–125 m at 5-m intervals. The values of the codispersion can range from -1 (dark blue) through 0 (white) to 1 (dark red). Statistical significance for codispersion coefficients computed at each spatial lag is shown in Fig. 3.



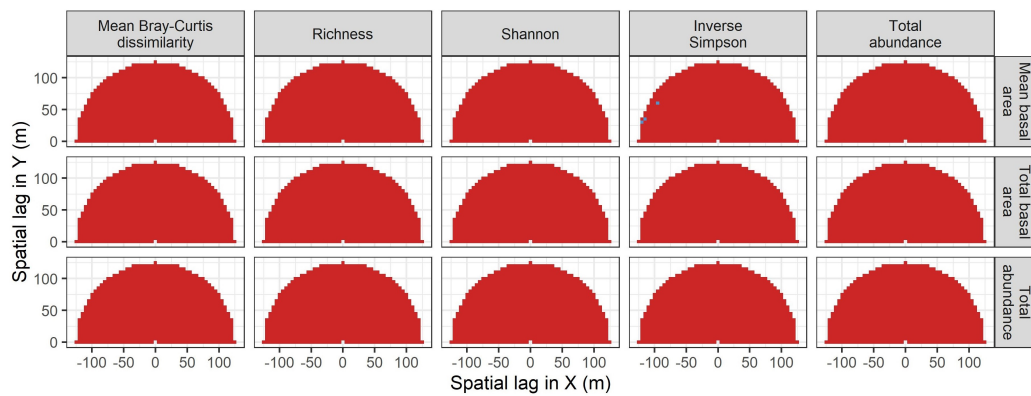

Figure 3: Statistical significance of the codispersion coefficients calculated between basal area or abundance of *Acer barbinerve* and five different measures of diversity of associated woody species in 5-m subplots in the 25-ha Muling (MLG) plot. Statistical significance was determined by comparing observed codispersion at each spatial lag with the distribution of 199 spatial randomizations of a toroidal-shift null model. Red:  $P \leq 0.05$ ; Blue:  $P > 0.05$ .

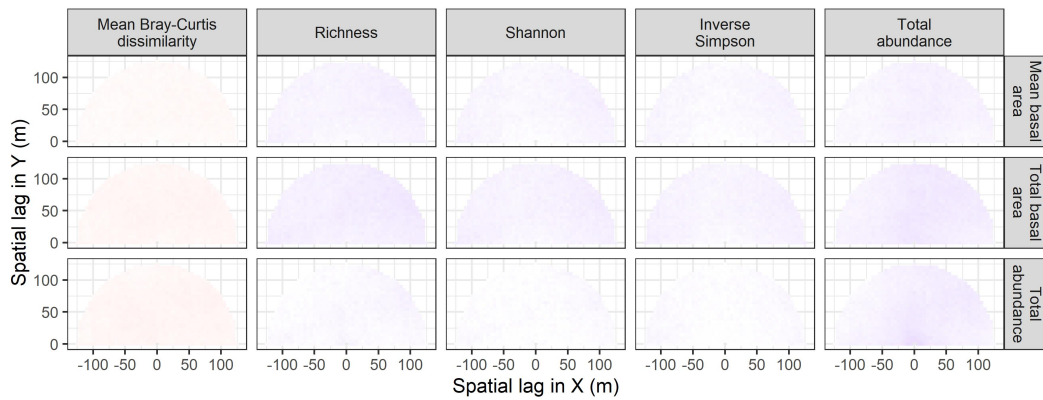

Figure 4: Codispersion between mean basal area, total basal area, or total abundance of *Acer ukurunduense* and five different measures of diversity of associated woody species in 5-m subplots in the 25-ha Muling (MLG) plot. Codispersion coefficients were calculated for spatial lags ranging from 0–125 m at 5-m intervals. The values of the codispersion can range from -1 (dark blue) through 0 (white) to 1 (dark red). Statistical significance for codispersion coefficients computed at each spatial lag is shown in Fig. 5.

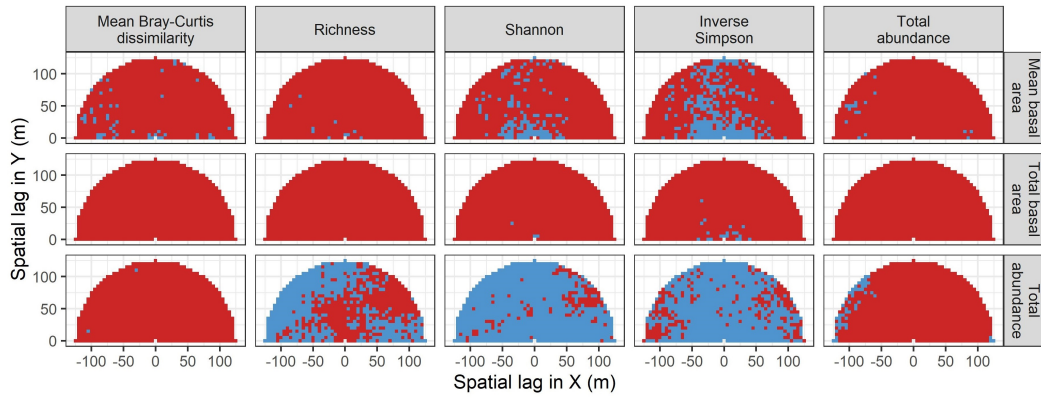

Figure 5: Statistical significance of the codispersion coefficients calculated between basal area or abundance of *Acer ukurunduense* and five different measures of diversity of associated woody species in 5-m subplots in the 25-ha Muling (MLG) plot. Statistical significance was determined by comparing observed codispersion at each spatial lag with a distribution of 199 spatial randomizations of a toroidal-shift null model. Red:  $P \leq 0.05$ ; Blue:  $P > 0.05$ .

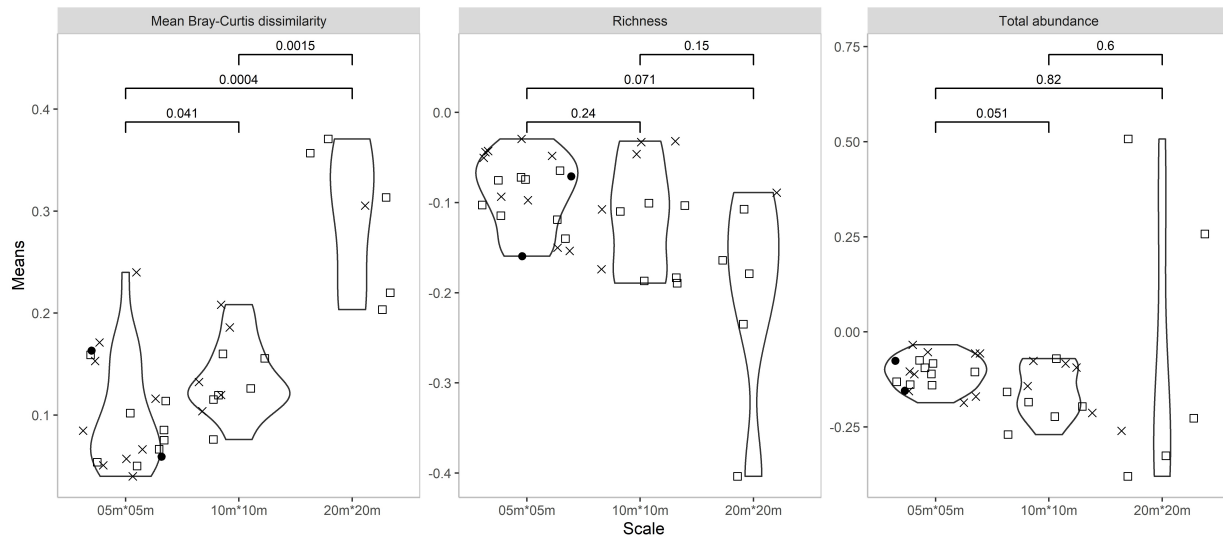

Figure 6: Distribution of average codispersion observed between total basal area of candidate foundation species and Bray-Curtis dissimilarity, species richness, and total abundance of associated woody plant species in contiguous 5 × 5-, 10 × 10-, and 20 × 20-m subplots in the twelve CForBio plots. Points indicate mean codispersion values for each candidate foundation species listed in Table 2; solid points indicate the two candidate foundation species in the genus *Acer* that met both the outlier *and* diversity criterion for all indices; hollow squares indicate candidate species that met the outlier criterion and the relaxed diversity criterion; and crosses indicate the remaining candidate foundation species that met only the relaxed diversity criterion. *P* values for comparisons between groups are shown at the top of each panel.

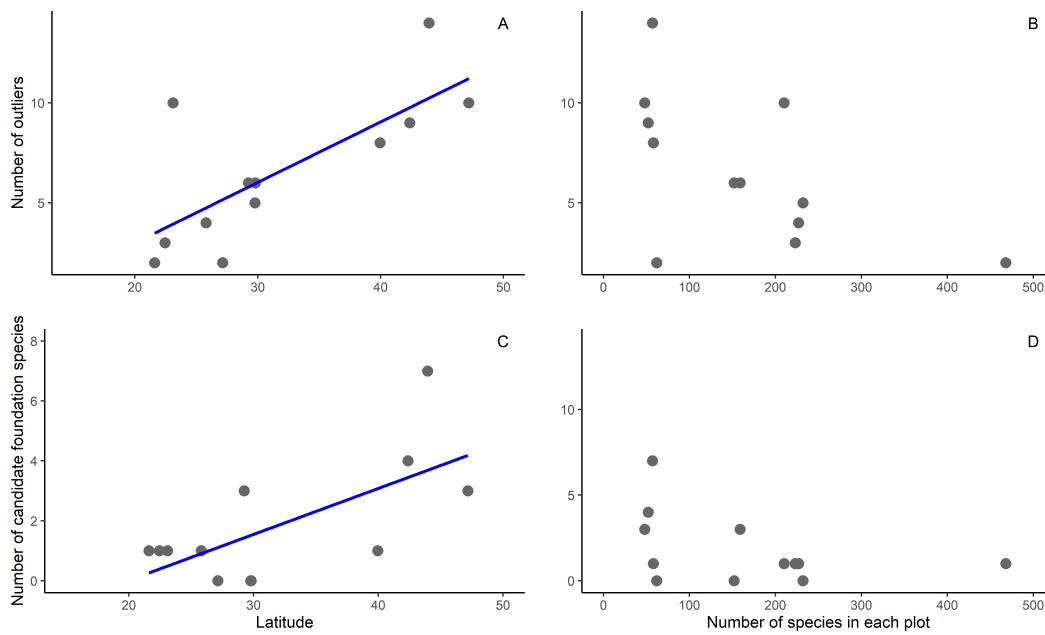

Figure 7: Number of outliers from the expected size-frequency distribution (Fig. 1) and number of candidate foundation species (Table 3) as a function of latitude (**A**, **C**) or plot-level species richness (**B**, **D**). See main text for regression statistics.

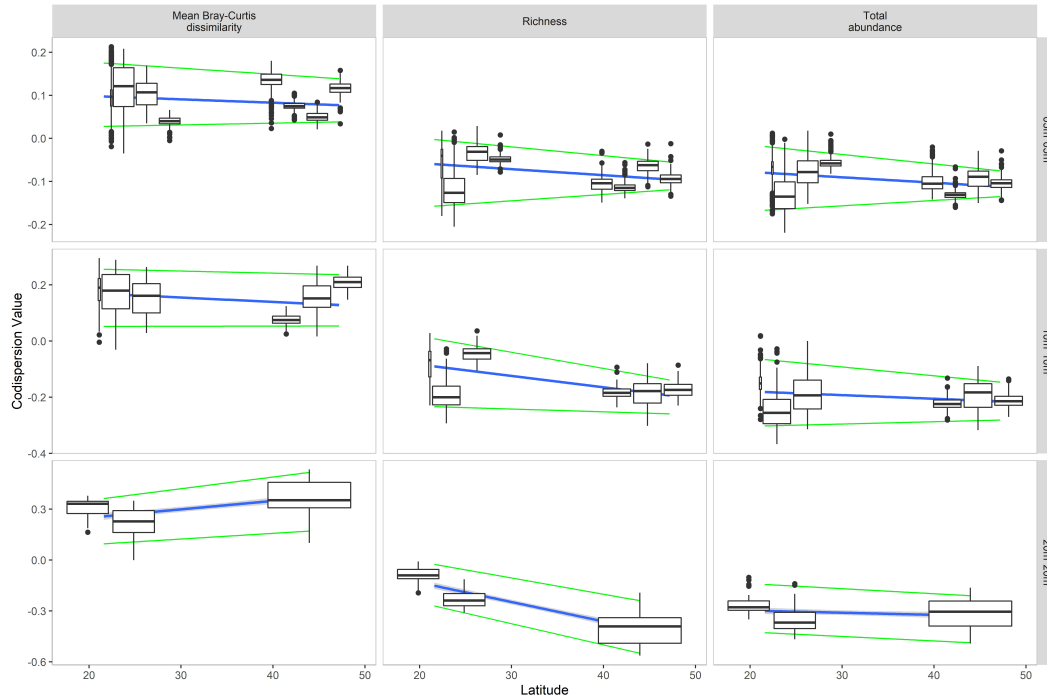

Figure 8: Relationship between latitude and codispersion between candidate foundation species (canopy trees and understory trees and shrubs) and three measures of associated woody-plant diversity at different spatial grains. Box plots illustrate median, upper and lower quartiles, and individual points outside of the upper and lower deciles of average codispersion at each latitude where candidate foundation species occurred (Table 3). Lines are regressions on all the data (blue lines), or on the 5% or 95% quantiles of the data (green lines).

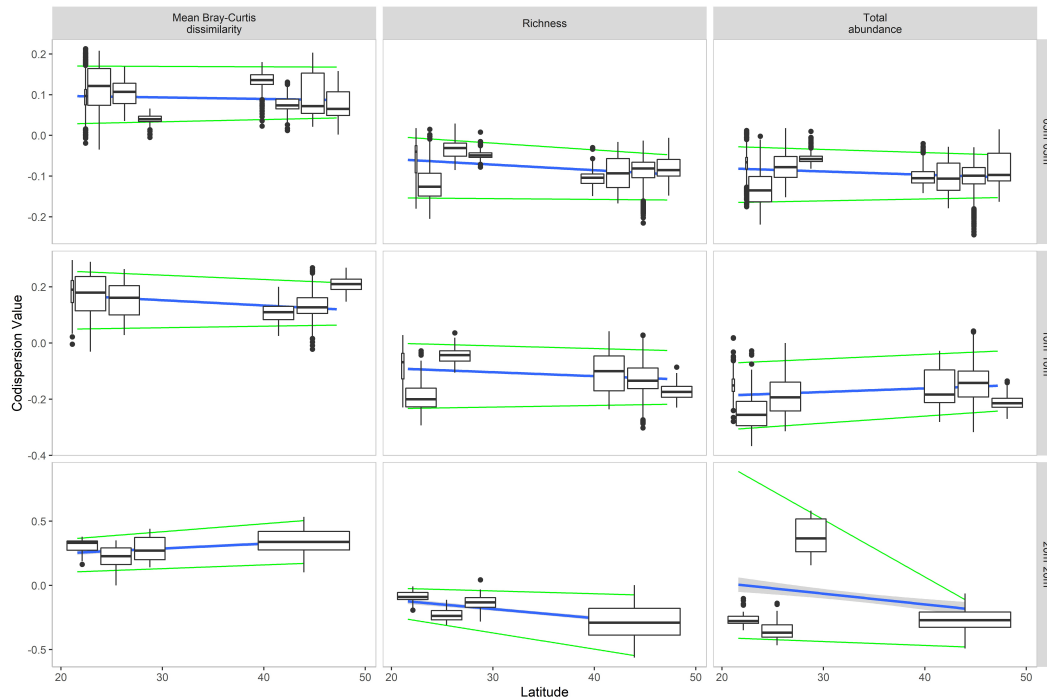

Figure 9: Relationship between latitude and codispersion between candidate foundation canopy tree species and three measures of associated woody-plant diversity at different spatial grains. Box plots illustrate median, upper and lower quartiles, and individual points outside of the upper and lower deciles of average codispersion at each latitude where candidate foundation species occurred (Table 3). Lines are regressions on all the data (blue lines), or on the 5% or 95% quantiles of the data (green lines).
